1 **Full Title:** Co-immunoprecipitation with MYR1 identifies three additional proteins within  
2 the *Toxoplasma* parasitophorous vacuole required for translocation of dense granule  
3 effectors into host cells

4  
5 **Running Title:** Novel proteins required for *Toxoplasma* effector export

6  
7 Alicja M. Cygan<sup>a\*</sup>, Terence C. Theisen<sup>a\*</sup>, Alma G. Mendoza<sup>a</sup>, Nicole D. Marino<sup>a,b</sup>,  
8 Michael W. Panas<sup>a</sup>, and John C. Boothroyd<sup>a,#</sup>

9  
10 Author Affiliations:

11 <sup>a</sup>Department of Microbiology and Immunology, Stanford School of Medicine, Stanford  
12 CA, USA

13 <sup>b</sup>Current address: Department of Microbiology and Immunology, University of California,  
14 San Francisco CA, USA

15  
16 \* A.M.C. and T.C.T. contributed equally to this work. A.M.C. took the lead on writing the  
17 manuscript.

18  
19 #Address correspondence to John C. Boothroyd, [jboothr@stanford.edu](mailto:jboothr@stanford.edu)

20  
21 Word count, abstract: 177

22 Word count, text: 4,236

23

24 **Abstract**

25 *Toxoplasma gondii* is a ubiquitous, intracellular protozoan that extensively  
26 modifies infected host cells through secreted effector proteins. Many such effectors  
27 must be translocated across the parasitophorous vacuole (PV) in which the parasites  
28 replicate, ultimately ending up in the host cytosol or nucleus. This translocation has  
29 previously been shown to be dependent on five parasite proteins: MYR1, MYR2, MYR3,  
30 ROP17, and ASP5. We report here the identification of several MYR1-interacting and  
31 novel PV-localized proteins via affinity purification of MYR1, including TGGT1\_211460  
32 (dubbed MYR4), TGGT1\_204340 (dubbed GRA54) and TGGT1\_270320 (PPM3C).  
33 Further, we show that three of the MYR1-interacting proteins, GRA44, GRA45, and  
34 MYR4, are essential for the translocation of the *Toxoplasma* effector protein GRA16,  
35 and for the upregulation of human c-Myc and cyclin E1 in infected cells. GRA44 and  
36 GRA45 contain ASP5-processing motifs, but like MYR1, processing at these sites  
37 appears to be nonessential for their role in protein translocation. These results expand  
38 our understanding of the mechanism of effector translocation in *Toxoplasma* and  
39 indicate that the process is highly complex and dependent on at least eight discrete  
40 proteins.

41

## 42 **Importance**

43 *Toxoplasma* is an extremely successful intracellular parasite and important  
44 human pathogen. Upon infection of a new cell, *Toxoplasma* establishes a replicative  
45 vacuole and translocates parasite effectors across this vacuole to function from the host  
46 cytosol and nucleus. These effectors play a key role in parasite virulence. The work  
47 reported here newly identifies three parasite proteins that are necessary for protein  
48 translocation into the host cell. These results significantly increase our knowledge of the  
49 molecular players involved in protein translocation in *Toxoplasma*-infected cells, and  
50 provide additional potential drug targets.

## 51 **Introduction**

52 *Toxoplasma gondii* is an obligate intracellular parasite that can cause severe  
53 illness in immunocompromised individuals and the developing fetus. It is estimated to  
54 infect up to a third of the world's population, and has an unparalleled host range,  
55 infecting virtually any nucleated cell in almost any warm-blooded animal (1). In order to  
56 survive within a host cell, *Toxoplasma* tachyzoites, the rapidly-dividing, asexual stage of  
57 the parasite, establish a replicative niche, the parasitophorous vacuole (PV), whose  
58 membrane (PVM) acts as the interface between parasite and host. While the PV  
59 protects intracellular *Toxoplasma* from clearance by the innate immune system, it also  
60 acts as a barrier that *Toxoplasma* must overcome in order to hijack host resources.

61 *Toxoplasma* extensively modifies the host cells it infects via secreted effectors,  
62 either rhoptry (ROP) or dense granule (GRA) proteins, which it introduces into the host  
63 during or following invasion (2). In recent years, several *Toxoplasma* GRAs, including  
64 GRA16, GRA24, IST, HCE1/TEEGR, GRA28, and GRA18, have been identified that are  
65 translocated across the PVM into the host cell cytosol and/or nucleus, where they can  
66 have profound effects on host processes (3–9). The machinery that is responsible for  
67 the translocation of these effectors across the *Toxoplasma* PVM is incompletely  
68 defined. A recent forward genetic screen identified several parasite proteins essential  
69 for GRA protein translocation, including MYR1, MYR2, MYR3, (named for their effect on  
70 host c-Myc regulation) and the rhoptry-derived protein kinase, ROP17 (10–12).

71 Precisely how these proteins function to promote protein translocation across the PVM  
72 is poorly understood. Of the four, the only protein with a known biochemical function is

73 ROP17, a serine/threonine protein kinase that phosphorylates host, and perhaps  
74 parasite proteins at the PVM (6, 13, 14).

75 In addition to MYR1, MYR2, MYR3, and ROP17, an active *Toxoplasma* aspartyl  
76 protease V (ASP5), which proteolytically processes secreted proteins at the amino acid  
77 sequence “RRL” (also known as a *Toxoplasma* export element, or TEXEL), is also  
78 required for the translocation of all exported GRAs studied thus far (5, 6, 8, 9, 15–17). In  
79 *Plasmodium*, the homolog of ASP5, plasmepsin V, appears to “license” many proteins  
80 for export across the PVM by proteolytically processing them at a *Plasmodium* export  
81 element (“RxLxE/Q/D”) (18–21). Intriguingly, and as for *Plasmodium* (22, 23), not all of  
82 *Toxoplasma*’s exported GRAs contain “RRL” motifs (e.g. GRA24, GRA28, and  
83 HCE1/TEEGR lack such an element), which leaves open the possibility that ASP5’s role  
84 in translocation is in processing the translocation machinery, rather than the effectors  
85 themselves. Indeed, MYR1 is processed by ASP5, but this processing is not necessary  
86 for protein export, as unprocessed full length MYR1 harboring a mutated “RRL” motif  
87 can still promote the translocation of the effector GRA24 to the host nucleus (24). The  
88 role of ASP5 processing of MYR1, therefore, remains unknown.

89 To learn more about the mechanism of protein translocation in *Toxoplasma*, and  
90 to complement the genetic approaches taken previously, we report here the use of  
91 MYR1 as “bait” for immunoprecipitation followed by mass spectrometry (IP-MS) to  
92 identify putative MYR1-associated proteins that are involved in effector translocation. Of  
93 the many associating proteins, at least eleven are shown here or were previously known  
94 to be PV-localized and, of these, three additional proteins are now shown to be required  
95 for GRA translocation across the PVM. Interestingly, all three of these new components

96 contain “RRL” motifs, with two confirmed to be cleaved in an ASP5-dependent manner;  
97 yet, like MYR1, cleavage at these sites appears not to be required for their translocation  
98 function. Thus, we have expanded the list of proteins involved in GRA translocation to  
99 eight while also expanding the enigma of why at least three of these components are  
100 proteolytically processed without any apparent impact on their one known function.  
101

## 102 **Results**

103           We previously reported the use of a forward genetic screen to identify  
104 *Toxoplasma* genes required for the induction of human c-Myc. This identified *MYR1*,  
105 *MYR2*, *MYR3*, and *ROP17* as essential for the translocation of effector proteins across  
106 the PVM (10–12). Two of these proteins, MYR1 and MYR3, were found to co-precipitate  
107 with each other (11), and we hypothesized that MYR1 functions in complex with other  
108 yet unidentified proteins to facilitate effector translocation across the PVM. Given the  
109 small but significant reduction in plaque size observed when growing strains deleted in  
110 MYR1, MYR2, and MYR3 on human foreskin fibroblasts (HFFs) (11), we also reasoned  
111 that the genetic approach might also miss genes whose disruption substantially reduces  
112 fitness.

113           To identify additional MYR1-associating proteins, therefore, we adopted a  
114 biochemical approach. Specifically, we immunoprecipitated 3xHA-tagged MYR1 from  
115 HFFs infected for 24 hours with an RH::*MYR1-3xHA* strain, or from an untagged RH  
116 strain to control for proteins that co-precipitate with the anti-HA beads nonspecifically  
117 (**Fig. 1A**). Liquid chromatography-tandem mass spectrometry (LC-MS/MS) was  
118 performed on the eluates and the identified parasite proteins were ranked by the ratio of  
119 average normalized spectral abundance factors (NSAFs) for a given protein in the  
120 RH::*MYR1-3xHA* lysates compared to the RH control (25). This mass spectrometry  
121 experiment was performed twice (IP 1 and IP 2). As expected, MYR1 was the most  
122 enriched protein in both biological replicates (**Fig. 1B**). Additionally, several PV- or  
123 PVM-localized GRA proteins were highly enriched (enrichment score >10) in the MYR1-  
124 3xHA immunoprecipitations over the untagged RH control, including GRA44, CST1,

125 GRA52, MAG1, PPM11C, GRA50, MAF1a, GRA7, and a GRA12 paralog, in addition to  
126 two exported effector proteins, GRA16 and GRA28, of which GRA16 has been shown to  
127 be exported in a MYR1-dependent manner (10) (**Fig. 1B, File S1**). The large number of  
128 enriched PV- and PVM-localized proteins may be explained by the mild detergent  
129 conditions used (0.1% NP-40), which were chosen in an attempt to maintain associating  
130 proteins, although these proteins might also be associating with one another in large,  
131 non-specific complexes or lipid rafts (26).

132       Importantly, and also as expected, the known MYR1-associating protein, MYR3,  
133 was enriched in the MYR1-3xHA immunoprecipitations, albeit with an enrichment score  
134 (4.5) that did not put it in the top 20 most enriched proteins (**Fig. 1B, File S1**). Of note,  
135 ROP17 was not substantially enriched (enrichment score = 1.2) and no peptides for  
136 MYR2 were detected, but neither protein has previously been found to associate with  
137 MYR1 and so this was not unexpected. Human proteins with an enrichment score >10  
138 include Filamin-C (FLNC), DNA-dependent protein kinase catalytic subunit (PRKDC),  
139 sarcoplasmic/endoplasmic reticulum calcium ATPase 2 (ATP2A2), and Alpha-N-  
140 acetylglucosaminidase (NAGLU) (**File S1**). As our focus was on parasite proteins only,  
141 the potential role of these human proteins in *Toxoplasma* infection was not further  
142 investigated.

143       To screen for a possible role in GRA effector translocation, we focused on the  
144 top 6 most enriched parasite proteins: GRA44 (TGGT1\_228170), CST1  
145 (TGGT1\_264660), TGGT1\_204340, TGGT1\_211460, PPM3C (TGGT1\_270320), and  
146 GRA52 (TGGT1\_319340). GRA45 (TGGT1\_316250) was also pursued because it is a  
147 known binding partner of the top hit, GRA44 (27), and it also had a substantial



148 enrichment score of 5.2 in the immunoprecipitations (**Fig. 1B**). Interestingly, two well-  
149 characterized PV proteins that have not previously been described to be involved in  
150 effector translocation, GRA7 (TGGT1\_203310) and MAF1a (TGGT1\_279100), were  
151 substantially enriched and, since antibodies and gene knockouts for both were readily  
152 available, we included these in the list of genes to explore further. Lastly, as a positive  
153 control for a protein whose disruption is known to prevent effector translocation, we also  
154 included MYR3 in the pipeline for gene disruption and testing. All ten proteins chosen  
155 for further analysis are highlighted in orange in Fig. 1B.

156         With the exception of ASP5, and as might be expected, all proteins so far  
157 published as required for effector translocation across the PVM localize to the PV/PVM  
158 (2). Of the ten proteins chosen for further analysis, GRA44, GRA45, CST1, GRA7,  
159 GRA52, and MAF1a, are all known to be PV/PVM-localized (27–31). The localization of  
160 211460 and PPM3C has not been reported, but both include predicted signal peptides  
161 (see below) as does 204340 which has been described as possibly micronemal (32).  
162 We therefore set out to localize these three proteins within infected cells. To do this, we  
163 generated populations of parasites in which each of the three genes was endogenously  
164 modified to encode a 3xHA-tag immediately before the stop codon and then assessed  
165 the protein's localization by immunofluorescence assay (IFA). Correct integration of the  
166 3xHA-tag into the appropriate locus was confirmed by PCR and by checking for an  
167 appropriately sized HA-tagged protein via western blotting. The results (**Fig. 2A**)  
168 showed major bands at ~130 kDa, ~110 kDa, and ~70 kDa for 211460, 204340, and  
169 PPM3C, respectively. In the case of 204340 and PPM3C, this is close to the predicted  
170 sizes of ~97 kDa and ~60kDa (ToxoDB v45). For 211460, however, the mobility is

171 significantly retarded relative to its predicted size of ~100 kDa. This could be due to its  
172 acidic pI of 4.91 (ToxoDB v45) which is known to reduce protein mobility on SDS-PAGE  
173 (33), and/or to post-translational modifications (all three proteins are reported to be  
174 phosphorylated (31; ToxoDB v45)). This same slower-than-expected mobility for the  
175 major band was seen for an independently generated, cloned line expressing HA-  
176 tagged 211460 (**Fig. S1A**) and so we conclude that this is the correct mobility for this  
177 protein. Interestingly, both the 211460-3xHA tagged population and single clone also  
178 showed a smaller but considerably weaker band at around the expected size (~100  
179 kDa). Whether this smaller MYR4 product is biologically relevant, or is simply a product  
180 of protein degradation, is unclear.

181         Using the HA-tagged 211460, 204340, and PPM3C parasite populations, we next  
182 sought to determine the localization of these proteins in infected cells. Using SignalP  
183 software (v5.0), all three proteins have strongly predicted signal peptides although in the  
184 case of 211460, this is only true if translation starts at the fourth in-frame methionine  
185 (position 61) relative to the protein sequence predicted on ToxoDB (v45). The results  
186 (**Fig. 2B**) show a clear PV-like signal outside of the parasites in the 211460-3xHA,  
187 204340-4xHA, and PPM3C-3xHA populations, including at the periphery of the PV. The  
188 PV-localization for 211460 is further confirmed in the independently generated clonal  
189 line (**Fig. S1B**). Thus, we conclude that 211460, 204340, and PPM3C are at least  
190 transiently localized to the *Toxoplasma* PV during infection. Furthermore, we also  
191 assessed the localization of these proteins within the parasites themselves. The results  
192 (**Fig. S2**) show that while PPM3C appears to be present throughout the parasite,  
193 211460 and 204340 show a clear, punctate staining pattern that largely co-localizes

194 with the dense granule protein GRA7, suggesting that these two proteins are also GRA  
195 proteins. We therefore designate 204340 as *GRA54* for its GRA-like localization, and  
196 211460 as *MYR4*, for reasons described below.

197 To assess their potential involvement in GRA effector translocation, we  
198 attempted to generate knockouts of our candidate genes in a strain of *Toxoplasma* that  
199 constitutively expresses an HA-tagged version of the MYR1-dependent secreted  
200 effector protein GRA16, RH $\Delta$ *gra16::GRA16-HA* (“parental”). To do this, we co-  
201 transfected a CRISPR/Cas9 sgRNA plasmid that targets the first exon of the relevant  
202 gene along with a pTKO2-CAT-mCherry plasmid (CAT encodes the chloramphenicol-  
203 resistance gene, chloramphenicol acetyl transferase; **Fig. 3A**). Following selection with  
204 chloramphenicol, we cloned the populations by limiting dilution and confirmed disruptive  
205 integration of the vector by PCR with gene-specific primers. Using this strategy, we  
206 were able to disrupt the genomic loci of *MYR3*, *GRA44*, *GRA45*, *CST1*, *GRA54*, *MYR4*,  
207 *PPM3C*, and *GRA7* (**Fig. S3**). Despite several attempts, however, we were unable to  
208 generate a *GRA52* mutant. This gene may be essential as it has a very negative  
209 CRISPR fitness score of -3.96 (35). Given that the *MAF1* locus is expanded in  
210 *Toxoplasma*, with 4 copies in RH parasites (36), we chose not to attempt a  
211 CRISPR/Cas9 approach to knockout *MAF1a*, and instead utilized a previously  
212 generated strain in which the entire *MAF1* cluster (including *MAF1a* and *MAF1b*) is  
213 deleted (31).

214 To determine if the absence of any of the candidate genes results in a defect in  
215 effector translocation across the PVM, we used IFA to assess both GRA16-HA export to  
216 the host nucleus and host c-Myc upregulation (which *Toxoplasma* induces during

217 infection (37)) in the disrupted lines. Quantified results for all nine genes tested show  
218 that disruption of *GRA44*, *GRA45*, *MYR4* and the previously described *MYR3*, all  
219 resulted in a complete or near-complete block in GRA16 export to the host nucleus  
220 (**Figs. 3B, S4**) and a failure to upregulate host c-Myc (**Figs. 3C, S4**); on the other hand,  
221 disruption of *GRA7*, *CST1*, *GRA54*, or *PPM3C* resulted in no detectable effect on either  
222 of these two phenotypes. Additionally, we found that the previously generated  $\Delta maf1$   
223 strain also had normal GRA16 export to the host nucleus (**Fig. 3D**). These results  
224 indicate that of the nine genes tested here, only *MYR3*, *GRA44*, *GRA45* and *MYR4* are  
225 necessary for the translocation of GRA effectors across the PVM.

226 To test the generality of their role in effector translocation, we next assessed the  
227 impact of these gene disruptions on the upregulation of host cyclin E1 which has been  
228 shown to be dependent on export of the MYR1-dependent effector HCE1/TEEGR (6).  
229 The results showed that, as for GRA16, disruption of *MYR3*, *GRA44*, *GRA45*, and  
230 *MYR4* also resulted in a block in cyclin E1 upregulation in infected host cells, while no  
231 obvious defect was observed in the parasite lines disrupted in *GRA7*, *CST1*, *GRA54*  
232 and *PPM3C* (**Fig. 3E**). A repetition of the cyclin E1 western blot with higher parasite  
233 input reveals that the absence of cyclin E1 upregulation observed in  $\Delta gra44$  parasites in  
234 Fig. 3E is not due to low parasite input in that particular experiment (**Fig. S5**). These  
235 results argue that *GRA44*, *GRA45* and *MYR4* are all required for translocation across  
236 the PVM of at least two independent GRA effectors.

237 Our previous work has shown that deletion of *MYR1*, *MYR2*, and *MYR3* results in  
238 a small but significant, negative effect on parasite growth *in vitro* (11). To determine if  
239 disruption of the three new genes involved in effector translocation described here has a

240 similar impact, we infected HFF monolayers with each of the disrupted lines, fixed the  
241 monolayers 7 days post infection, and measured plaque size. The results show that the  
242  $\Delta myr4$ ,  $\Delta gra44$  and  $\Delta gra45$  strains all exhibit a significant growth defect compared to the  
243 parental strain (**Fig. 3F**). We did not test for rescue of the growth phenotype with  
244 complementation due to limitations in selectable markers available in these strains. The  
245  $\Delta gra54$  and  $\Delta ppm3c$  strains, on the other hand, did not have significant growth defects,  
246 consistent with the growth defects observed being dependent on the respective  
247 genotype rather than nonspecific effects of the manipulations.

248 To confirm that ablation of *GRA44*, *GRA45*, and *MYR4* loci are responsible for  
249 the observed defect in GRA16 export, we transiently expressed a C-terminally V5-  
250 tagged version of each protein, driven by its native promoter, in the relevant disrupted  
251 line. These transiently transfected parasites were then assessed for GRA16-HA export  
252 to the host nucleus via IFA. The results showed that the parental and complemented  
253 strains had GRA16-HA signal in both the vacuole and host nucleus, while the parasites  
254 within the population that did not express the complementing transgene (as indicated by  
255 lack of anti-V5 staining) showed essentially no GRA16 in the host nucleus (**Figs. 4A,**  
256 **4B**). Thus *GRA44*, *GRA45*, and *MYR4* are indeed essential for the translocation of  
257 effectors across the PVM, and we therefore designate *211460* as *MYR4*, consistent with  
258 previous nomenclature (10, 11).

259 Interestingly, *GRA44*, *GRA45* and *MYR4* all contain one or two instances of the  
260 three-amino-acid motif “RRL” (**Fig. 5A**), which has previously been shown to be the  
261 preferred sequence for cleavage by ASP5 protease (15). Indeed, cleavage at the three  
262 sites shown in *GRA44* and *GRA45* (27), as well as at the first “RRL” motif in the

263 secreted GRA effector, GRA16 (15), has been experimentally confirmed. ASP5 is  
264 essential for the translocation of all GRA effectors so far tested (5, 6, 8, 9, 15–17) and it  
265 has previously been suggested that ASP5-mediated cleavage of some effectors is  
266 required to “license” them for translocation across the PVM, as appears to be the case  
267 in *Plasmodium* (38, 39). Given, however, that not all such effectors contain ASP5  
268 processing motifs (e.g., GRA24 lacks the canonical “RRL” and shows no evidence of  
269 ASP5-dependent processing; (17)), and given that the three newly identified  
270 components of the translocation machinery identified here do, we hypothesized that  
271 ASP5’s essential contribution to effector translocation across the PVM might be in  
272 processing one or more components of the translocation machinery. We have  
273 previously shown that MYR1 is also processed by ASP5 at a “RRL” site but this does  
274 not appear to be required for MYR1 to function in effector translocation (24) and so we  
275 turned our attention to the newly identified translocation components identified here.

276 To determine if processing at the “RRL” sites of GRA44, GRA45, and MYR4 is  
277 required for protein translocation activity, we mutated the ASP5 cleavage sites by  
278 converting the first arginine to an alanine (i.e., RRL→ARL) in the V5-tagged  
279 complementation plasmids for each gene, and transiently transfected these into the  
280 corresponding disrupted line. Western blots were then used to show that processing of  
281 GRA45 at its lone “RRL” and of GRA44 at its second “RRL” is indeed abrogated by the  
282 mutations (**Fig. 5B**). For the more N-terminal site in GRA44 (R83A), we cannot  
283 definitively confirm that the mutation abrogates ASP5 processing because GRA44 is  
284 epitope-tagged at its C-terminus and so, assuming cleavage at the two sites is an  
285 independent event, cleavage at the downstream site will produce a C-terminal, V5-

286 tagged fragment whether or not cleavage occurs at R83A. We fully expect, however,  
287 that the RRL→ARL change disrupts ASP5 cleavage at this site because it did in the two  
288 other examples shown here (GRA45 and the downstream site in GRA44, R1348A) and  
289 because RRL→ARL mutations have previously been shown to disrupt the ASP5-  
290 dependent cleavage of other proteins (24, 27).

291 Interestingly, mutation of the “RRL” to an “ARL” in MYR4 did not appear to affect  
292 the processing of the protein (**Fig. 5B**). To rule out whether this is due to incomplete  
293 ablation of the ASP5 processing site with a single amino acid substitution, we assessed  
294 the processing of an RRL→AAA MYR4 mutant where the entire ASP5-processing motif  
295 is mutated to alanines. The results (**Fig. 5C**) show that the higher molecular weight  
296 product of MYR4 (~130kD) does not change in mobility upon mutation of the entire  
297 “RRL” motif, and thus we conclude that little if any MYR4 is processed by ASP5. Note  
298 that, despite repeated attempts with large amounts of DNA, the signal for the transiently  
299 expressed MYR4 was never strong enough to confidently conclude whether a small  
300 amount of a processed form might be present in these transiently transfected parasites;  
301 we therefore cannot comment on whether the low-intensity, smaller molecular weight  
302 product of MYR4 (~100kD) seen in long exposures of endogenously tagged wild type  
303 MYR4 (**Figs. 2A, S1A**) is a result of an ASP5 processing event.

304 Having generated the four RRL→ARL mutants, and having validated that ASP5  
305 cleavage is ablated in at least two instances, we next tested each for its impact on the  
306 localization of the epitope-tagged, C-terminal portion of the protein and on the ability of  
307 the uncleaved protein to function; i.e., whether it can rescue the defect in effector  
308 protein translocation. The results show that the RRL→ARL mutated versions of each

309 protein are still secreted into the PV, similar to the wild type copy (**Figs. 6A, 4A**), and  
310 are all able to rescue the translocation defect to a similar extent as the corresponding  
311 control (WT) plasmid (**Fig. 6B**). While the GRA45 R64A mutant did substantially rescue  
312 translocation, it did not consistently rescue to wildtype levels. Nevertheless, these data  
313 suggest that mutation of the “RRL” sites in GRA44, GRA45, and MYR4 to “ARL” does  
314 not substantially affect their function in effector protein translocation.



## 315 Discussion

316 Using affinity purification of MYR1 under conditions expected to retain  
317 associating partners, we identify three novel parasite proteins, GRA44, GRA45, and  
318 MYR4, as essential for the export of GRA effectors into infected cells. Additionally, we  
319 localize MYR4, as well as two additional MYR1-associating proteins, GRA54 and  
320 PPM3C, to the PV in infected cells. Altogether, eight proteins are now known to be  
321 necessary for effector export: the 3 described here and MYR1, MYR2, MYR3,  
322 ROP17 and ASP5 – summarized in Table S1 (10–12, 15–17). Besides ASP5, which  
323 localizes to the Golgi (15–17), these proteins all localize to the PV/PVM.

324 The newly identified components described here do not display any homology to  
325 known protein translocation machinery based on BLAST analysis results (BLASTP  
326 2.10.0+), making it difficult to infer their functions and thus which, if any, are part of an  
327 actual translocon remains unknown. In addition to lacking homology to known  
328 translocation machinery, MYR4 and GRA45 do not have detectable homology to any  
329 other known, functional protein domains and neither do they share homology to proteins  
330 in any species outside of *Coccidia/Eimeriorina*. Like MYR1, MYR2, MYR3, and ROP17,  
331 however, MYR4, GRA44 and GRA45 all have clear orthologs in *Hammondia hammondi*  
332 and *Neospora caninum* (**Table S1**).

333 GRA44, by contrast, contains a putative phosphatase domain that shares  
334 homology to a region of the *Plasmodium* serine/threonine phosphatase UIS2 (28%  
335 identity over 21% of the protein; BLASTP 2.10.0+), which has recently been shown to  
336 localize to the *Plasmodium* PVM in liver stage parasites (40). Whether UIS2 plays a  
337 role in protein translocation in *Plasmodium* remains to be determined but this would be

338 surprising given that none of the other components of the complex known to promote  
339 translocation in *Plasmodium* (known as PTEX) so far studied play a role in translocation  
340 in *Toxoplasma* (2). Additionally, whether this phosphatase domain is important for  
341 effector export in *Toxoplasma* is not yet known. Given that the kinase domain of ROP17  
342 is necessary for GRA16 export (12) it is intriguing that two of the eight factors necessary  
343 for effector export are either a kinase or a phosphatase. There are numerous serine  
344 residues that are phosphorylated among MYR1, MYR2, MYR3, and MYR4, supporting  
345 the possibility that phosphorylation of the translocation machinery is critical to regulating  
346 its function in effector export. While this work was in progress, we learned of similar  
347 studies by Blakely, Arrizabalaga and colleagues who also found that GRA44 associates  
348 with MYR1 and is necessary for efficient c-Myc upregulation during infection (see  
349 accompanying manuscript). These latter authors used a knockdown approach to study  
350 GRA44 and saw a more dramatic impact of GRA44 loss on parasite growth than we  
351 report here for the GRA44 knockout; this might indicate that compensatory changes  
352 were selected for during the prolonged selection necessary to generate and expand our  
353 knockout clone, as was reported for AMA1 knockouts that showed dramatic up-  
354 regulation of the paralogue, AMA2 (41). Thus, transcriptomic analysis of the GRA44  
355 knockout may reveal clues to its specific role(s) in *Toxoplasma* tachyzoites.

356 Our results expand the enigmas of why some parasite proteins are proteolytically  
357 processed by ASP5, and why ASP5 is essential for effector translocation across the  
358 PVM. MYR1, GRA44, and GRA45 all possess “RRL” motifs that appear to be cleaved in  
359 an ASP5-dependent manner yet, surprisingly, their function in the export of GRA16, and  
360 of GRA24 in the case of MYR1 (24), appears agnostic to mutation of these sites.

361 For MYR1, we previously showed that the two domains generated by ASP5 processing  
362 stay connected through a disulfide bond after cleavage (11); it remains to be determined  
363 whether the polypeptides formed by RRL cleavage in GRA44 and GRA45 likewise  
364 associate in a similar manner. It is also important to note that our assays may not be  
365 sensitive enough to detect small changes in protein abundance in the host nucleus, and  
366 that it is the combination of multiple proteins not being processed by ASP5 that is  
367 deleterious to export in  $\Delta asp5$  mutants, rather than the result of failure to cleave any  
368 single protein.

369 Interestingly, there was a large number of proteins that were more highly  
370 enriched than MYR3 in our immunoprecipitations with MYR1, and it remains a strong  
371 possibility that additional MYR1-associating proteins are involved in effector  
372 translocation. Due to the large number of enriched proteins and the limited throughput  
373 of our approach, we were unable to investigate all candidates for such a role;  
374 nevertheless, our data showing that GRA16-HA export is not lost in parasites disrupted  
375 for *GRA7*, *CST1*, *MAF1*, *PPM3C*, or *GRA54* strongly suggests that it is not general  
376 PV/PVM disruption that results in the loss of effector translocation. Further work will be  
377 needed to determine which of the remaining proteins we see enriched in the MYR1  
378 immunoprecipitations are there because of specific association with MYR1 vs.  
379 nonspecific associations of proteins within the PV/PVM due to association within lipid  
380 rafts or other entities.

381 Lastly, none of *GRA44*, *GRA45*, or *MYR4* were identified in the forward genetic  
382 screen of parasites that are unable to induce c-Myc (10). This could be due to the  
383 growth defects observed in  $\Delta myr4$ ,  $\Delta gra44$ , and  $\Delta gra45$  parasites shown here since

384 parasites with null mutations in these genes might be lost during the 7-8 rounds of  
385 selection used in that screen due to a fitness disadvantage. Alternatively, the  
386 mutagenesis-based genetic screen was not saturating and so a more comprehensive,  
387 genome-wide screen using CRISPR/Cas9 technologies might reveal these and other  
388 genes responsible for effector translocation in *Toxoplasma*. Regardless, our finding of  
389 three new components of the export machinery provides a richer understanding of how  
390 *Toxoplasma* delivers effectors into host cells. Future work will determine the precise  
391 function of each, including how they interact, the role of ASP5 cleavage, and which, if  
392 any, constitutes the actual translocon.

393

394

## 395 **Materials and Methods**

396

### 397 **Parasite strains, culture and infections**

398 All *Toxoplasma* tachyzoites used in this study are in the Type I “RH” background,  
399 either RH::*MYR1-3xHA* (11), RH $\Delta$ *gra16::GRA16HA* (6), RH $\Delta$ *maf1* (31), RH $\Delta$ *hpt* (42), or  
400 RH $\Delta$ *hpt* $\Delta$ *ku80* (43). These tachyzoites, and all subsequently generated lines, were  
401 propagated in human foreskin fibroblasts (HFFs) cultured in complete Dulbecco’s  
402 Modified Eagle Medium (cDMEM) supplemented with 10% heat-inactivated fetal bovine  
403 serum (FBS; HyClone, Logan, UT), 2 mM L-glutamine, 100 U/ml penicillin and 100  
404  $\mu$ g/ml streptomycin at 37 °C with 5% CO<sub>2</sub>. The HFFs were obtained from the neonatal  
405 clinic at Stanford University following routine circumcisions that are performed at the  
406 request of the parents for cultural, health or other personal medical reasons (i.e., not in  
407 any way related to research). These foreskins, which would otherwise be discarded, are  
408 fully de-identified and therefore do not constitute “human subjects research”.

409 Prior to infection, parasites were scraped and syringe-lysed using a 27 G needle,  
410 counted using a hemocytometer, and added to HFFs. “Mock” infection was done by first  
411 syringe-lysing uninfected HFFs, processing this in the same manner as done for the  
412 infected cells, and then adding the same volume of the resulting material as used for  
413 infections. For experiments where human c-Myc protein was detected, the parasites  
414 were added to HFFs in media containing 0% serum.

### 415 **Immunofluorescence assay (IFA)**

416 Infected cells grown on glass coverslips were fixed and permeabilized using  
417 100% cold methanol for 10 min. Samples were washed 3x with PBS and blocked using

418 3% BSA in PBS for 1 hour at room temperature (RT). HA was detected with rat  
419 monoclonal anti-HA antibody 3F10 (Roche), SAG1 was detected with mouse anti-SAG1  
420 monoclonal antibody DG52 (44), GRA7 was detected with rabbit anti-GRA7 antibodies  
421 (45), V5 was detected with mouse anti-V5 tag monoclonal antibody (Invitrogen), and c-  
422 Myc was detected with rabbit monoclonal anti-c-Myc antibody Y69 (Abcam). Primary  
423 antibodies were detected with goat polyclonal Alexa Fluor-conjugated secondary  
424 antibodies (Invitrogen). Primary and secondary antibodies were both diluted in 3% BSA  
425 in PBS. Coverslips were incubated with primary antibodies for 1 hour at RT, washed,  
426 and incubated with secondary antibodies for 1 hour at RT. Vectashield with DAPI stain  
427 (Vector Laboratories) was used to mount the coverslips on slides. Fluorescence was  
428 detected using wide-field epifluorescence microscopy and images were analyzed using  
429 ImageJ. All images shown for any given condition/staining in any given  
430 comparison/dataset were obtained using identical parameters.

### 431 **Transfections**

432 All transfections were performed using the Amaxa 4D Nucleofector (Lonza)  
433 model. Tachyzoites were mechanically released in PBS, pelleted, and resuspended in  
434 20  $\mu$ L P3 Primary Cell Nucleofector Solution (Lonza) with 5-25  $\mu$ g DNA for transfection.  
435 After transfection, parasites were allowed to infect HFFs in DMEM.

### 436 **Plasmid construction**

437 For gene disruption plasmids: gRNAs designed against a PAM site of each gene  
438 of interest were cloned into the pU6-Universal plasmid. pU6-Universal was a gift from  
439 Sebastian Lourido (Addgene plasmid # 52694 ; <http://n2t.net/addgene:52694> ;  
440 RRID:Addgene\_52694).

441 For ectopic expression plasmids: The pGRA-V5 plasmid was created by  
442 replacing the HA tag sequence in the pGRA-HPT-HA plasmid (46) with the V5 tag DNA  
443 sequence (GGCAAGCCCATCCCCAACCCCCTGCTGGGCCTGGACAGCAC) and  
444 removing the HPT resistance cassette using standard molecular biology techniques.  
445 The pX-V5 plasmid was created by removing the GRA1 promoter from pGRA-V5 using  
446 standard molecular biology techniques. Complementation plasmids to ectopically  
447 express V5 tagged proteins off their native promoters were created by PCR  
448 amplification of the open reading frame of each gene, minus the stop codon, plus ~2000  
449 bp upstream of the start codon to include the native promoter, followed by cloning into  
450 pX-V5 using Gibson Assembly (NEB). RRL→ARL or RRL→AAA mutated  
451 complementation plasmids were generated using overlap extension PCR using primers  
452 harboring the mutation and cloning the resultant products into pX-V5 using Gibson  
453 Assembly (NEB).

454 For endogenous tagging plasmids: Approximately 1500-3000 bp of the 3' coding  
455 sequence of each gene was amplified from RH genomic DNA and cloned into the  
456 pTKO2-HPT-3xHA plasmid (11) using either Gibson Assembly (NEB) or by cloning into  
457 the EcoRV and NotI restriction sites.

458 A list of all primers and plasmids used and generated in this study can be found  
459 in **File S2**.

#### 460 **Endogenous tagging**

461 Endogenous tagging plasmids were transfected into *Toxoplasma* via  
462 electroporation. Tachyzoites were allowed to infect HFFs in T25 flasks for 24 hours,  
463 after which the medium was changed to complete DMEM supplemented with 50 µg/ml

464 mycophenolic acid and 50 µg/ml xanthine for selection for the hypoxanthine-xanthine-  
465 guanine-phosphoribosyltransferase (HXGPRT or HPT) marker for 3-5 days.

#### 466 **Gene disruption**

467 A list of all sgRNA sequences used in this study can be found in **File S2**.

468 RHΔ*gra16*::GRA16HA tachyzoites were transfected with pTKO2-CAT-mCherry (CAT is  
469 chloramphenicol acetyl transferase which confers resistance to chloramphenicol; the  
470 plasmid was a gift from Ian Foe and Matthew Bogyo (47)) and the corresponding  
471 modified pU6-sgRNA plasmid and allowed to infect HFFs for 24-48 hours. For gene  
472 disruption of MYR3, the previously published pSAG1:U6-Cas9:sgMYR3 plasmid was  
473 used instead (11). Between 24-48 hours after transfection, DMEM media with 80 µM  
474 chloramphenicol was added to the cells. The media was replaced with fresh  
475 chloramphenicol-supplemented media every 48-72 hours. After at least 7 days in  
476 selection, single clones were selected from the transfected populations in 96 well plates  
477 using limiting dilution. Single clones were maintained in chloramphenicol-supplemented  
478 media until confirmation of the genetic disruption.

#### 479 **Ectopic expression**

480 Plasmids for ectopic expression were transiently transfected into *Toxoplasma*  
481 using electroporation. Tachyzoites were allowed to infect HFFs for 18-24 hours before  
482 assessing for expression of the ectopically expressed protein via either IFA or western  
483 blotting.

#### 484 **Western blotting**

485 Cell lysates were prepared at the indicated time points post-infection in Laemmli  
486 sample buffer (BioRad). The samples were boiled for 5 min, separated by SDS-PAGE,



487 and transferred to polyvinylidene difluoride (PVDF) membranes. Membranes were  
488 blocked with 5% nonfat dry milk in TBS supplemented with 0.5% Tween-20, and  
489 proteins were detected by incubation with primary antibodies diluted in blocking buffer  
490 followed by incubation with secondary antibodies (raised in goat against the appropriate  
491 species) conjugated to horseradish peroxidase (HRP) and diluted in blocking buffer. HA  
492 was detected using a horseradish peroxidase (HRP)-conjugated HA antibody (Roche  
493 cat no. 12013819001), SAG2A was detected using rabbit polyclonal anti-SAG2A  
494 antibodies (48), Cyclin E1 was detected using mouse monoclonal antibody HE12 (Santa  
495 Cruz Biotechnology), and GAPDH was detected using mouse monoclonal anti-GAPDH  
496 antibody 6C5 (Calbiochem). Horseradish peroxidase (HRP) was detected using  
497 enhanced chemiluminescence (ECL) kit (Pierce).

#### 498 **Plaque assay**

499 Parasites were syringe-released from HFFs and added to confluent HFFs in T25  
500 flasks. After 7 days, the infected monolayers were washed with PBS, fixed with  
501 methanol, and stained with crystal violet. Plaque area was measured using ImageJ.

#### 502 **Immunoprecipitations (IPs) for mass spectrometry**

503 IPs to identify MYR1-interacting proteins in HFFs were performed as follows.  
504 One 15-cm dish of HFFs for each infection condition was grown to confluence. HFFs  
505 were infected with either  $15 \times 10^6$  RH::MYR1-3xHA or RH $\Delta$ hpt parasites for 24 hours.  
506 Infected cells were washed 3 times in cold PBS and then scraped into 1 mL cold cell  
507 lysis buffer (50mM Tris (pH 8.0), 150mM NaCl, 0.1% (v/v) Nonidet P-40 Alternative  
508 [CAS no. 9016-45-9]) supplemented with complete protease inhibitor cocktail  
509 (cOmplete, EDTA-free [Roche]). Cell lysates were passed 3 times through a 25 G

510 needle, followed by 3 times through a 27 G needle, followed by sonication on ice  
511 (Branson Sonifier 250), with 3 pulses of 10 s at 50% duty cycle and output control 2.  
512 Cell lysates were spun at  $1000 \times g$  for 10 min to remove insoluble material and unlysed  
513 cells. Lysates were added to 100  $\mu\text{L}$  magnetic beads conjugated to anti-HA antibodies  
514 (Pierce) and incubated overnight rotating at 4 °C. Unbound protein lysate was removed,  
515 and the anti-HA magnetic beads were then washed 10 times in cell lysis buffer. HA-  
516 tagged MYR1, and associated proteins, were eluted in 60  $\mu\text{L}$  pH 2.0 buffer (Pierce) for  
517 10 min at 50 °C to dissociate proteins from the antibody-conjugated beads. The elutions  
518 were immediately neutralized 1:10 with pH 8.5 neutralization buffer (Pierce).

#### 519 **Mass spectrometry sample preparation**

520 45  $\mu\text{L}$  of each IP elution was combined with 15  $\mu\text{L}$  of 4X Laemmli sample buffer  
521 supplemented with BME (BioRad), boiled for 10 min at 95 °C, and loaded on a Bolt 4-  
522 12% Bis-Tris gel (Invitrogen). The samples were resolved for approximately 8 min at  
523 150V. The gel was washed once in UltraPure water (Thermo), fixed in 50% methanol  
524 and 7% acetic acid for 15 min, followed by 3 additional washes with UltraPure water.  
525 The gel was stained for 10 min with GelCode Blue (Thermo) and washed with UltraPure  
526 water for an additional 20 min. One gel band (approx. 1.5 cm in size) for each condition  
527 was excised and de-stained for 2 hours in a 50% methanol and 10% acetic acid  
528 solution, followed by a 30 min soak in UltraPure water. Each gel slice was cut into 1 mm  
529 x 1 mm squares, covered in 1% acetic acid solution, and stored at 4 °C until the in-gel  
530 digestion could be performed.

531 To prepare samples for mass spectrometry, the 1% acetic acid solution was  
532 removed, 10  $\mu\text{L}$  of 50 mM DTT was added, and volume was increased to 100  $\mu\text{L}$  with 50

533 mM ammonium bicarbonate. Samples were incubated at 55 °C for 30 min. Samples  
534 were then brought down to RT, DTT solution was removed, 10 µl of 100 mM acrylamide  
535 (propionamide) was added and volume was again normalized to 100 µl with 50 mM  
536 ammonium bicarbonate followed by an incubation at RT for 30 min. Acrylamide solution  
537 was removed, 10 µl (0.125 µg) of Trypsin/LysC (Promega) solution was added and  
538 another 50 µl of 50 mM ammonium bicarbonate was added to cover the gel pieces.  
539 Samples were incubated overnight at 37 °C for peptide digestion. Solution consisting of  
540 digested peptides was collected in fresh Eppendorf tubes, 50 µl of extraction buffer  
541 (70% acetonitrile, 29% water, 1% formic acid) was added to gel pieces, incubated at 37  
542 °C for 10 min, centrifuged at 10,000 x g for 2 minutes and collected in the same tubes  
543 consisting of previous elute. This extraction was repeated one more time. Collected  
544 extracted peptides were dried to completion in a speed vac and stored at 4 °C until  
545 ready for mass spectrometry.

#### 546 **Mass spectrometry**

547 Eluted, dried peptides were dissolved in 12.5 µl of 2% acetonitrile and 0.1%  
548 formic acid and 3 µl was injected into an in-house packed C18 reversed phase  
549 analytical column (15 cm in length). Peptides were separated using a Waters M-Class  
550 UPLC, operated at 450 nL/min using a linear 80 minute gradient from 4-40% mobile  
551 phase B. Mobile phase A consisted of 0.2% formic acid, 99.8% water, Mobile phase B  
552 was 0.2% formic acid, 99.8% acetonitrile. Ions were detected using an Orbitrap Fusion  
553 mass spectrometer operating in a data dependent fashion using typical “top speed”  
554 methodologies. Ions were selected for fragmentation based on the most intense multiply

555 charged precursor ions using Collision induced dissociation (CID). Data from these  
556 analyses was then transferred for analysis.

### 557 **Mass spectrometric analysis**

558 The .RAW data were searched using MaxQuant version 1.6.1.0 against the  
559 canonical human database from UniProt, *Toxoplasma* GT1 databases from ToxoDB  
560 (versions 7.3 and 37.0), and the built-in contaminant database. Specific parameters  
561 used in the MaxQuant analysis can be found in **File S1**. Peptide and protein  
562 identifications were filtered to a 1% false discovery rate (FDR) and reversed proteins,  
563 contaminants, and proteins only identified by a single modification site, were removed  
564 from the dataset. MYR1-3xHA enrichment over the non-HA tagged RH was determined  
565 by adding 1 to each spectral count (tandem MS [MS/MS count]) and calculating the  
566 NSAF (number of spectral counts identifying a protein divided by the protein's length,  
567 divided by the sum of all spectral counts/lengths for all proteins in the experiment). The  
568 average MYR1-3xHA enrichment from the two biological replicates (IP 1 and IP 2) was  
569 used to determine the protein ranking.

### 570 **Data availability**

571 The mass spectrometry proteomics data have been deposited to the  
572 ProteomeXchange Consortium (<http://proteomecentral.proteomexchange.org>) via the  
573 PRIDE partner repository (49) with the dataset identifier PXD016383.

574

## 575 **Acknowledgements**

576           We thank all members of our laboratory, as well as Melanie Espiritu for help with  
577 tissue culture and ordering, Ian Foe and Matthew Bogyo for providing reagents, Ryan  
578 Leib and Kratika Singhal for helpful advice regarding mass spectrometry, and Will  
579 Blakely and Gustavo Arrizabalaga for helpful discussions and exchange of data prior to  
580 publication. Special thanks to the Vincent Coates Foundation Mass Spectrometry  
581 Laboratory at Stanford University Mass Spectrometry (SUMS) for assistance in  
582 processing mass spectrometry samples.

583           This project has been funded in whole or part with federal funds from the U.S.  
584 National Institute of Allergy and Infectious Diseases, National Institutes of Health,  
585 Department of Health and Human Services, under awards NIH RO1-AI021423 (J.C.B.)  
586 and NIH RO1-AI129529 (J.C.B.), NIH T32-AI732832 (A.M.C.), NIH T32-AI007328  
587 (T.C.T.), NIH T32-AI732832 (A.G.M.), NIH F31-AI120649 (N.D.M.), with funds from the  
588 National Science Foundation Graduate Research Fellowship Program  
589 (<https://www.nsfgrfp.org/>) under grant DGE-114747 (A.M.C.), with support from the  
590 Stanford Bio-X Graduate Research Fellowship (T.C.T.), and with grant NIH P30  
591 CA124435 for utilization of the Stanford Cancer Institute Proteomics/Mass Spectrometry  
592 Shared Resource. The funders had no role in study design, data collection and analysis,  
593 decision to publish, or preparation of the manuscript.

594

595

596 **References**

- 597 1. Hill DE, Chirukandoth S, Dubey JP. 2005. Biology and epidemiology of  
598 *Toxoplasma gondii* in man and animals . Anim Heal Res Rev.
- 599 2. Rastogi S, Cygan AM, Boothroyd JC. 2019. Translocation of effector proteins into  
600 host cells by *Toxoplasma gondii*. Curr Opin Microbiol.
- 601 3. Bougdour A, Durandau E, Brenier-Pinchart MP, Ortet P, Barakat M, Kieffer S,  
602 Curt-Varesano A, Curt-Bertini RL, Bastien O, Coute Y, Pelloux H, Hakimi MA.  
603 2013. Host cell subversion by *Toxoplasma* GRA16, an exported dense granule  
604 protein that targets the host cell nucleus and alters gene expression. Cell Host  
605 Microbe2013/04/23. 13:489–500.
- 606 4. Braun L, Brenier-Pinchart MP, Yogavel M, Curt-Varesano A, Curt-Bertini RL,  
607 Hussain T, Kieffer-Jaquinod S, Coute Y, Pelloux H, Tardieux I, Sharma A, Belrhali  
608 H, Bougdour A, Hakimi MA. 2013. A *Toxoplasma* dense granule protein, GRA24,  
609 modulates the early immune response to infection by promoting a direct and  
610 sustained host p38 MAPK activation. J Exp Med 210:2071–2086.
- 611 5. Gay G, Braun L, Brenier-Pinchart MP, Voltaire J, Josserand V, Bertini RL,  
612 Varesano A, Touquet B, De Bock PJ, Coute Y, Tardieux I, Bougdour A, Hakimi  
613 MA. 2016. *Toxoplasma gondii* TglST co-opts host chromatin repressors  
614 dampening STAT1-dependent gene regulation and IFN-gamma-mediated host  
615 defenses. J Exp Med 213:1779–1798.
- 616 6. Panas MW, Naor A, Cygan AM, Boothroyd JC. 2019. *Toxoplasma* Controls Host  
617 Cyclin E Expression through the Use of a Novel MYR1-Dependent Effector  
618 Protein, HCE1. Mbio2019/05/02. 10.

- 619 7. Nadipuram SM, Kim EW, Vashisht AA, Lin AH, Bell HN, Coppens I, Wohlschlegel  
620 JA, Bradley PJ. 2016. In Vivo biotinylation of the toxoplasma parasitophorous  
621 vacuole reveals novel dense granule proteins important for parasite growth and  
622 pathogenesis. *MBio* 7.
- 623 8. He H, Brenier-Pinchart MP, Braun L, Kraut A, Touquet B, Coute Y, Tardieux I,  
624 Hakimi MA, Bougdour A. 2018. Characterization of a Toxoplasma effector  
625 uncovers an alternative GSK3/beta-catenin-regulatory pathway of inflammation.  
626 *Elife* 7.
- 627 9. Braun L, Brenier-Pinchart MP, Hammoudi PM, Cannella D, Kieffer-Jaquinod S,  
628 Vollaire J, Josserand V, Touquet B, Couté Y, Tardieux I, Bougdour A, Hakimi MA.  
629 2019. The Toxoplasma effector TEEGR promotes parasite persistence by  
630 modulating NF- $\kappa$ B signalling via EZH2. *Nat Microbiol*.
- 631 10. Franco M, Panas MW, Marino ND, Lee MCW, Buchholz KR, Kelly FD, Bednarski  
632 JJ, Sleckman BP, Pourmand N, Boothroyd JC. 2016. A novel secreted protein,  
633 MYR1, is central to Toxoplasma's manipulation of host cells. *MBio* 7.
- 634 11. Marino ND, Panas MW, Franco M, Theisen TC, Naor A, Rastogi S, Buchholz KR,  
635 Lorenzi HA, Boothroyd JC. 2018. Identification of a novel protein complex  
636 essential for effector translocation across the parasitophorous vacuole membrane  
637 of *Toxoplasma gondii*. *PLoS Pathog* 14:e1006828.
- 638 12. Panas MW, Ferrel A, Naor A, Tenborg E, Lorenzi HA, Boothroyd JC. 2019.  
639 Translocation of Dense Granule Effectors across the Parasitophorous Vacuole  
640 Membrane in Toxoplasma- Infected Cells Requires the Activity of ROP17, a  
641 Rhoptyry Protein Kinase . *mSphere*.

- 642 13. El Hajj H, Lebrun M, Arold ST, Vial H, Labesse G, Dubremetz JF. 2007. ROP18 Is  
643 a Rhopty Kinase Controlling the Intracellular Proliferation of *Toxoplasma gondii*.  
644 PLoS Pathog 3:e14.
- 645 14. Etheridge RD, Alaganan A, Tang K, Lou HJ, Turk BE, Sibley LD. 2014. The  
646 *Toxoplasma* pseudokinase ROP5 forms complexes with ROP18 and ROP17  
647 kinases that synergize to control acute virulence in mice. *Cell Host Microbe*  
648 15:537–550.
- 649 15. Coffey MJ, Sleebs BE, Uboldi AD, Garnham A, Franco M, Marino ND, Panas MW,  
650 Ferguson DJ, Enciso M, O'Neill MT, Lopaticki S, Stewart RJ, Dewson G, Smyth  
651 GK, Smith BJ, Masters SL, Boothroyd JC, Boddey JA, Tonkin CJ. 2015. An  
652 aspartyl protease defines a novel pathway for export of *Toxoplasma* proteins into  
653 the host cell. *Elife* 4.
- 654 16. Hammoudi PM, Jacot D, Mueller C, Di Cristina M, Dogga SK, Marq JB, Romano  
655 J, Tosetti N, Dubrot J, Emre Y, Lunghi M, Coppens I, Yamamoto M, Sojka D, Pino  
656 P, Soldati-Favre D. 2015. Fundamental Roles of the Golgi-Associated  
657 *Toxoplasma* Aspartyl Protease, ASP5, at the Host-Parasite Interface. *PLoS*  
658 *Pathog* 11:e1005211.
- 659 17. Curt-Varesano A, Braun L, Ranquet C, Hakimi MA, Bougdour A. 2016. The  
660 aspartyl protease TgASP5 mediates the export of the *Toxoplasma* GRA16 and  
661 GRA24 effectors into host cells. *Cell Microbiol* 18:151–167.
- 662 18. Russo I, Babbitt S, Muralidharan V, Butler T, Oksman A, Goldberg DE. 2010.  
663 Plasmeprin v licenses *Plasmodium* proteins for export into the host erythrocyte.  
664 *Nature*.



- 665 19. Boddey JA, Hodder AN, Günther S, Gilson PR, Patsiouras H, Kapp EA, Pearce  
666 JA, De Koning-Ward TF, Simpson RJ, Crabb BS, Cowman AF. 2010. An aspartyl  
667 protease directs malaria effector proteins to the host cell. *Nature*.
- 668 20. Hiller NL, Bhattacharjee S, van Ooij C, Liolios K, Harrison T, Lopez-Estrano C,  
669 Haldar K. 2004. A host-targeting signal in virulence proteins reveals a secretome  
670 in malarial infection. *Science (80- )* 306:1934–1937.
- 671 21. Marti M, Good RT, Rug M, Knuepfer E, Cowman AF. 2004. Targeting malaria  
672 virulence and remodeling proteins to the host erythrocyte. *Science (80- )*  
673 306:1930–1933.
- 674 22. Heiber A, Kruse F, Pick C, Gruring C, Flemming S, Oberli A, Schoeler H, Retzlaff  
675 S, Mesen-Ramirez P, Hiss JA, Kadekoppala M, Hecht L, Holder AA, Gilberger  
676 TW, Spielmann T. 2013. Identification of new PNEPs indicates a substantial non-  
677 PEXEL exportome and underpins common features in *Plasmodium falciparum*  
678 protein export. *PLoS Pathog* 9:e1003546.
- 679 23. Spielmann T, Hawthorne PL, Dixon MW, Hannemann M, Klotz K, Kemp DJ,  
680 Klonis N, Tilley L, Trenholme KR, Gardiner DL. 2006. A cluster of ring stage-  
681 specific genes linked to a locus implicated in cytoadherence in *Plasmodium*  
682 *falciparum* codes for PEXEL-negative and PEXEL-positive proteins exported into  
683 the host cell. *Mol Biol Cell* 2006/06/09. 17:3613–3624.
- 684 24. Naor A, Panas MW, Marino N, Coffey MJ, Tonkin CJ, Boothroyd JC. 2018.  
685 MYR1-Dependent Effectors Are the Major Drivers of a Host Cell's Early Response  
686 to *Toxoplasma*, Including Counteracting MYR1-Independent Effects. *MBio* 9.
- 687 25. Florens L, Carozza MJ, Swanson SK, Fournier M, Coleman MK, Workman JL,

- 688 Washburn MP. 2006. Analyzing chromatin remodeling complexes using shotgun  
689 proteomics and normalized spectral abundance factors. *Methods* 40:303–311.
- 690 26. de Koning-Ward TF, Gilson PR, Boddey JA, Rug M, Smith BJ, Papenfuss AT,  
691 Sanders PR, Lundie RJ, Maier AG, Cowman AF, Crabb BS. 2009. A newly  
692 discovered protein export machine in malaria parasites. *Nature* 459:945–949.
- 693 27. Coffey MJ, Dagley LF, Seizova S, Kapp EA, Infusini G, Roos DS, Boddey JA,  
694 Webb AI, Tonkin CJ. 2018. Aspartyl Protease 5 Matures Dense Granule Proteins  
695 That Reside at the Host-Parasite Interface in *Toxoplasma gondii*. *MBio*.
- 696 28. Zhang YW, Halonen SK, Ma YF, Wittner M, Weiss LM. 2001. Initial  
697 characterization of CST1, a *Toxoplasma gondii* cyst wall glycoprotein. *Infect*  
698 *Immun* 69:501–507.
- 699 29. Fischer HG, Stachelhaus S, Sahm M, Meyer HE, Reichmann G. 1998. GRA7, an  
700 excretory 29 kDa *Toxoplasma gondii* dense granule antigen released by infected  
701 host cells. *Mol Biochem Parasitol* 91:251–262.
- 702 30. Tu V, Mayoral J, Sugi T, Tomita T, Han B, Ma YF, Weiss LM. 2019. Enrichment  
703 and proteomic characterization of the cyst wall from in vitro *Toxoplasma gondii*  
704 cysts. *MBio*.
- 705 31. Pernas L, Adomako-Ankomah Y, Shastri AJ, Ewald SE, Treeck M, Boyle JP,  
706 Boothroyd JC. 2014. *Toxoplasma* Effector MAF1 Mediates Recruitment of Host  
707 Mitochondria and Impacts the Host Response. *PLoS Biol* 12.
- 708 32. Huynh MH, Carruthers VB. 2009. Tagging of endogenous genes in a *Toxoplasma*  
709 *gondii* strain lacking Ku80. *Eukaryot Cell* 2009/02/17. 8:530–539.
- 710 33. Shirai A, Matsuyama A, Yashiroda Y, Hashimoto A, Kawamura Y, Arai R,

- 711 Komatsu Y, Horinouchi S, Yoshida M. 2008. Global analysis of gel mobility of  
712 proteins and its use in target identification. *J Biol Chem*.
- 713 34. Treeck M, Sanders JL, Elias JE, Boothroyd JC. 2011. The Phosphoproteomes of  
714 *Plasmodium falciparum* and *Toxoplasma gondii* Reveal Unusual Adaptations  
715 Within and Beyond the Parasites' Boundaries. *Cell Host Microbe* 2011/10/25.  
716 10:410–419.
- 717 35. Sidik SM, Huet D, Ganesan SM, Huynh MH, Wang T, Nasamu AS, Thiru P, Saeij  
718 JP, Carruthers VB, Niles JC, Lourido S. 2016. A Genome-wide CRISPR Screen in  
719 *Toxoplasma* Identifies Essential Apicomplexan Genes. *Cell* 166:1423-1435 e12.
- 720 36. Adomako-Ankomah Y, English ED, Danielson JJ, Pernas LF, Parker ML,  
721 Boulanger MJ, Dubey JP, Boyle JP. 2016. Host Mitochondrial Association  
722 Evolved in the Human Parasite *Toxoplasma gondii* via Neofunctionalization of a  
723 Gene Duplicate. *Genetics*.
- 724 37. Franco M, Shastri AJ, Boothroyd JC. 2014. Infection by *Toxoplasma gondii*  
725 Specifically Induces Host c-Myc and the Genes This Pivotal Transcription Factor  
726 Regulates. *Eukaryot Cell* 13:483–493.
- 727 38. Russo I, Babbitt S, Muralidharan V, Butler T, Oksman A, Goldberg DE. 2010.  
728 Plasmeprin V licenses *Plasmodium* proteins for export into the host erythrocyte.  
729 *Nature* 463:632–636.
- 730 39. Boddey JA, Hodder AN, Gunther S, Gilson PR, Patsiouras H, Kapp EA, Pearce  
731 JA, de Koning-Ward TF, Simpson RJ, Crabb BS, Cowman AF. 2010. An aspartyl  
732 protease directs malaria effector proteins to the host cell. *Nature* 463:627–631.
- 733 40. Schnider CB, Bausch-Fluck D, Brühlmann F, Heussler VT, Burda P-C. 2018.

- 734            BiID Reveals Novel Proteins of the Plasmodium Parasitophorous Vacuole  
735            Membrane. *mSphere*.
- 736    41.    Lamarque MH, Roques M, Kong-Hap M, Tonkin ML, Rugarabamu G, Marq JB,  
737            Penarete-Vargas DM, Boulanger MJ, Soldati-Favre D, Lebrun M. 2014. Plasticity  
738            and redundancy among AMA-RON pairs ensure host cell entry of *Toxoplasma*  
739            parasites. *Nat Commun* 5:4098.
- 740    42.    Donald RGK, Carter D, Ullman B, Roos DS. 1996. Insertional tagging, cloning,  
741            and expression of the *Toxoplasma gondii* hypoxanthine-xanthine-guanine-  
742            phosphoribosyltransferase gene. *J Biol Chem* 271:14010–14019.
- 743    43.    Fox BA, Ristuccia JG, Gigley JP, Bzik DJ. 2009. Efficient gene replacements in  
744            *Toxoplasma gondii* strains deficient for nonhomologous end joining. *Eukaryot*  
745            *Cell*2009/02/17. 8:520–529.
- 746    44.    Burg JL, Perelman D, Kasper LH, Ware PL, Boothroyd JC. 1988. Molecular  
747            analysis of the gene encoding the major surface antigen of *Toxoplasma gondii*. *J*  
748            *Immunol* 141:3584–3591.
- 749    45.    Dunn JD, Ravindran S, Kim SK, Boothroyd JC. 2008. The *Toxoplasma gondii*  
750            dense granule protein GRA7 is phosphorylated upon invasion and forms an  
751            unexpected association with the rhoptry proteins ROP2 and ROP4. *Infect Immun*  
752            76:5853–5861.
- 753    46.    Saeij JPJ, Boyle JP, Collier S, Taylor S, Sibley LD, Brooke-Powell ET, Ajioka JW,  
754            Boothroyd JC. 2006. Polymorphic Secreted Kinases Are Key Virulence Factors in  
755            Toxoplasmosis. *Science* (80- ) 314:1780–1783.
- 756    47.    Foe IT, Onguka O, Amberg-Johnson K, Garner RM, Amara N, Beatty W, Yeh E,

- 757 Bogyo M. 2018. The *Toxoplasma gondii* Active Serine Hydrolase 4 Regulates  
758 Parasite Division and Intravacuolar Parasite Architecture. *mSphere* 3.
- 759 48. Grigg ME, Bonnefoy S, Hehl AB, Suzuki Y, Boothroyd JC. 2001. Success and  
760 virulence in *Toxoplasma* as the result of sexual recombination between two  
761 distinct ancestries. *Science* (80- ) 294:161–165.
- 762 49. Vizcaíno JA, Csordas A, Del-Toro N, Dianes JA, Griss J, Lavidas I, Mayer G,  
763 Perez-Riverol Y, Reisinger F, Ternent T, Xu QW, Wang R, Hermjakob H. 2016.  
764 2016 update of the PRIDE database and its related tools. *Nucleic Acids Res.*  
765  
766

767 **Figures and Figure Legends**

768

769 **Supplemental File 1.**

770 Mass spectrometry analysis parameters and results for proteins that

771 coimmunoprecipitate with MYR1-3xHA-expressing and untagged RH parasites. For all

772 sheets, the IDs corresponding to the majority proteins, i.e., the proteins which contained

773 at least half of the peptides belonging to a protein group (grouping of proteins which

774 cannot be unambiguously identified by unique peptides), the number of spectral counts

775 (MS/MS count), the average NSAF enrichment score (MYR1/RH Enrichment, as further

776 elaborated in Materials and Methods), and the protein rank as defined by the

777 enrichment score corresponding to each grouping are shown. The gene product

778 (for *Toxoplasma* proteins) or associated gene name (for human proteins) for the first

779 listed protein ID in each row is shown in the Description column. Sheet 1

780 (“Toxo\_proteins”) shows the experimental data sets for *Toxoplasma* proteins only, listed

781 in rank order by the average NSAF enrichment from both experiments. Sheet 2

782 (“All\_proteins”) shows the experimental data sets for both human and *Toxoplasma*

783 proteins, listed in rank order by the average NSAF enrichment from both experiments.

784 Sheet 3 (“Parameters”) shows the parameters used in the MaxQuant analysis.

785

786 **Supplemental File 2.**

787 Primers, sgRNA sequences, and plasmids used and/or generated in this study.

788

789 **Supplemental Table 1.**

790 Summary of *Toxoplasma* genes necessary for effector translocation. The number of  
791 predicted transmembrane domains, number of “RRL” motifs, and CRISPR phenotype  
792 score are listed for each *Toxoplasma* gene necessary for effector translocation  
793 identified thus far. Additionally, the percent identities of each of these genes to their  
794 orthologs in *Hammondia hammondi* and *Neospora caninum*, and whether the “RRL”  
795 sequences are conserved in these species are also listed. Transmembrane domain  
796 prediction based on Phobius (Lukas Kall et al., Nucleic Acids Res 35:W429-32, 2007,  
797 <https://doi.org/10.1093/nar/gkm256>). CRISPR phenotype scores are from Sidik et al.  
798 (Cell 166(6):1423-1435.e12, <https://doi.org/10.1016/j.cell.2016.08.019>). Identity calculated by  
799 comparison to head-to-head comparison of ortholog in indicated species using  
800 Sequence Manipulation Suite (Stothard P, Biotechniques 28:1102-1104, [https://doi.org/](https://doi.org/10.2144/00286ir01)  
801 [10.2144/00286ir01](https://doi.org/10.2144/00286ir01)).

802

### 803 **Supplemental Figure 1.**

804 A. Western blot of endogenously tagged 211460-3xHA single clone and population.  
805 HFFs were infected with RH $\Delta$ *hpt* $\Delta$ *ku80* tachyzoites (RH) or endogenously tagged  
806 RH::211460-3xHA parasites (either from the population or an independently  
807 generated single clone). Lysates from infected HFFs were prepared and 211460-  
808 3xHA was detected by western blotting using rat anti-HA antibodies. Rabbit anti-  
809 SAG2A staining was used as a loading control for total parasite protein. The  
810 western blot for the 211460-3xHA population is the same data as presented in  
811 Fig 2A. Approximate migration of a ladder of size standards (sizes in kDa) is  
812 indicated.

813 B. Immunofluorescence microscopy of endogenously tagged 211460-3xHA from an  
814 independently generated single clone. Tachyzoites were allowed to infect HFFs  
815 for 16 hours before the infected monolayer was fixed with methanol. 211460-  
816 3xHA was detected with rat anti-HA antibodies, *Toxoplasma* tachyzoites were  
817 detected with mouse anti-SAG1 antibodies, and the infected monolayer was  
818 visualized with DIC. Scale bar is 10 $\mu$ m.

819

### 820 **Supplemental Figure 2.**

821 Immunofluorescence microscopy of endogenously tagged proteins in extracellular  
822 parasites. The populations of endogenously tagged parasites analyzed in Fig. 2A were  
823 seeded onto empty coverslips before being fixed with methanol. The corresponding  
824 tagged proteins were detected with rat anti-HA antibodies, the marker for dense granule  
825 proteins, GRA7, was detected with rabbit anti-GRA7 antibodies, and the parasites were  
826 visualized with differential interference microscopy (DIC). Scale bar is 5 $\mu$ m.

827

### 828 **Supplemental Figure 3.**

829 A. Schematic of CRISPR-mediated gene disruption of candidate genes. Primers  
830 flanking the guide-targeted region, indicated by “Forward” and “Reverse”, were  
831 constructed to amplify a ~1000bp region of the native, uninterrupted gene.  
832 pTKO2-CAT-mCherry is the plasmid used for integration and selection.

833 B. PCR amplifications of genomic DNA from RH $\Delta$ *gra16*::GRA16-HA parasites  
834 (parental) and from a chloramphenicol-resistant (CAT<sup>+</sup>) clonal strain with  
835 disruption of the indicated gene using the forward and reverse primers shown in  
836 Panel A. Sizes (base pairs) of the standard ladder are shown. Bands of the



837 expected size in the parental strain (~1000bp) and either lack of a band or  
838 presence of altered bands in the disrupted strains, indicate insertion of the  
839 selection plasmid within the targeted gene, as indicated (e.g.,  $\Delta myr3$  is a strain  
840 with a disruption of the *MYR3* locus).

841

#### 842 **Supplemental Figure 4.**

843 Immunofluorescence microscopy of GRA16-HA nuclear localization and human nuclear  
844 c-Myc expression in HFFs infected with the indicated disrupted parasite strains.  
845 Tachyzoites were allowed to infect HFFs (without serum) for 18 hours before the  
846 infected monolayers were fixed with methanol and stained with rat anti-HA antibodies  
847 and rabbit anti-c-Myc antibodies. Host nuclei were visualized using DAPI. Scale bar is  
848 20 $\mu$ m.

849

#### 850 **Supplemental Figure 5.**

851 Western blot of human cyclin E1 protein in cells infected with the indicated parasite  
852 strain. HFFs were infected with the indicated strain of tachyzoites, or mock-treated with  
853 uninfected HFF lysate, for 20 hours before lysates were generated for immunoblotting.  
854 Lysates were analyzed by western blotting using mouse anti-cyclin E1 antibodies.  
855 Rabbit anti-SAG2A was used to assess the levels of parasite protein in the lysate.

856

**A**

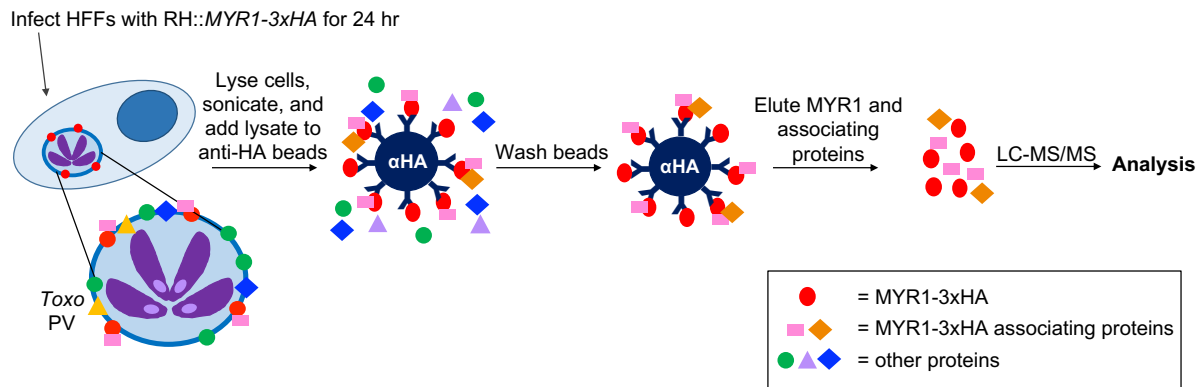

**B**

| GeneID<br>(TGGT1_)        | Description   | MS/MS Count |      |            |      |      |     | Enrichment | Rank |
|---------------------------|---------------|-------------|------|------------|------|------|-----|------------|------|
|                           |               | MYR1        |      | RH Control |      |      |     |            |      |
|                           |               | IP 1        | IP 2 | IP 1       | IP 2 |      |     |            |      |
| 254470                    | MYR1          | 111         | 121  | 0          | 1    | 65.3 | 1   |            |      |
| 228170                    | GRA44         | 55          | 37   | 0          | 0    | 35.4 | 2   |            |      |
| 264660                    | CST1          | 47          | 29   | 0          | 0    | 29.4 | 3   |            |      |
| 204340                    | Hypothetical  | 48          | 27   | 0          | 0    | 29.1 | 4   |            |      |
| 211460                    | Hypothetical  | 40          | 27   | 0          | 0    | 26.0 | 5   |            |      |
| 270320                    | PPM3C         | 36          | 27   | 0          | 0    | 24.4 | 6   |            |      |
| 319340                    | GRA52         | 33          | 23   | 0          | 0    | 21.8 | 7   |            |      |
| 270240                    | MAG1          | 44          | 32   | 0          | 2    | 21.4 | 8   |            |      |
| 258458                    | Hypothetical  | 30          | 21   | 0          | 0    | 19.9 | 9   |            |      |
| 304955                    | PPM11C        | 27          | 17   | 0          | 0    | 17.3 | 10  |            |      |
| 294200                    | G6PDH         | 21          | 16   | 0          | 0    | 14.6 | 11  |            |      |
| 229480                    | TgERC         | 29          | 15   | 0          | 1    | 14.5 | 12  |            |      |
| 233870                    | Hypothetical  | 19          | 17   | 0          | 0    | 14.2 | 13  |            |      |
| 237500                    | PPM3A         | 19          | 16   | 0          | 0    | 13.9 | 14  |            |      |
| 203600                    | GRA50         | 19          | 16   | 0          | 0    | 13.9 | 15  |            |      |
| 279100                    | MAF1a         | 16          | 19   | 0          | 0    | 13.8 | 16  |            |      |
| 203310                    | GRA7          | 16          | 16   | 0          | 0    | 12.7 | 17  |            |      |
| 208830                    | GRA16         | 17          | 11   | 0          | 0    | 11.3 | 18  |            |      |
| 275860                    | GRA12 paralog | 16          | 12   | 0          | 0    | 11.3 | 19  |            |      |
| 299780                    | Hypothetical  | 14          | 14   | 0          | 0    | 11.2 | 20  |            |      |
| 231960                    | GRA28         | 13          | 12   | 0          | 0    | 10.1 | 21  |            |      |
| ...                       | ...           | ...         | ...  | ...        | ...  | ...  | ... |            |      |
| 316250                    | GRA45         | 5           | 7    | 0          | 0    | 5.2  | 60  |            |      |
| ...                       | ...           | ...         | ...  | ...        | ...  | ...  | ... |            |      |
| 237230                    | MYR3          | 7           | 3    | 0          | 0    | 4.5  | 67  |            |      |
| ...                       | ...           | ...         | ...  | ...        | ...  | ...  | ... |            |      |
| 258580                    | ROP17         | 26          | 25   | 18         | 13   | 1.2  | 224 |            |      |
| <b>Total MS/MS count:</b> |               | 6174        | 4295 | 3694       | 1858 |      |     |            |      |

857

858 **Figure 1. MYR1-3xHA immunoprecipitation identifies many MYR1-associating**

859 ***Toxoplasma* proteins.**

860 A. Schematic of MYR1 IP-MS workflow.

861 B. Results of IP-MS analysis. Mass spectrometry was performed on

862 immunoprecipitated material as depicted in Fig. 1A and the number of spectral

863 counts was determined for all identified proteins. This experiment was performed

864 twice (IP 1 and IP 2) for both RH::MYR1-3xHA and an RH $\Delta$ *hpt* untagged control.

865 The identified *Toxoplasma* proteins from the two experiments were ranked

866 according to the average NSAF enrichment in the MYR1-3xHA-expressing strain

867 relative to the untagged RH control after adding a nominal single count to all

868 results, enabling a ratio to be determined (Enrichment and Rank). The full

869 dataset, including associating host proteins, is presented in File S1. Displayed

870 here are the majority *Toxoplasma* protein identifiers (TGGT1\_), i.e., the proteins

871 that contain at least half of the peptides belonging to a group of proteins that

872 cannot be unambiguously identified by unique peptides, the descriptive name for

873 each protein (Description), and the corresponding number of spectral counts

874 detected (MS/MS count) for all *Toxoplasma* proteins with an average enrichment

875 score greater than 10. Also shown are data for the proteins GRA45, MYR3, and

876 ROP17. Genes chosen for subsequent disruption are highlighted in orange.

877

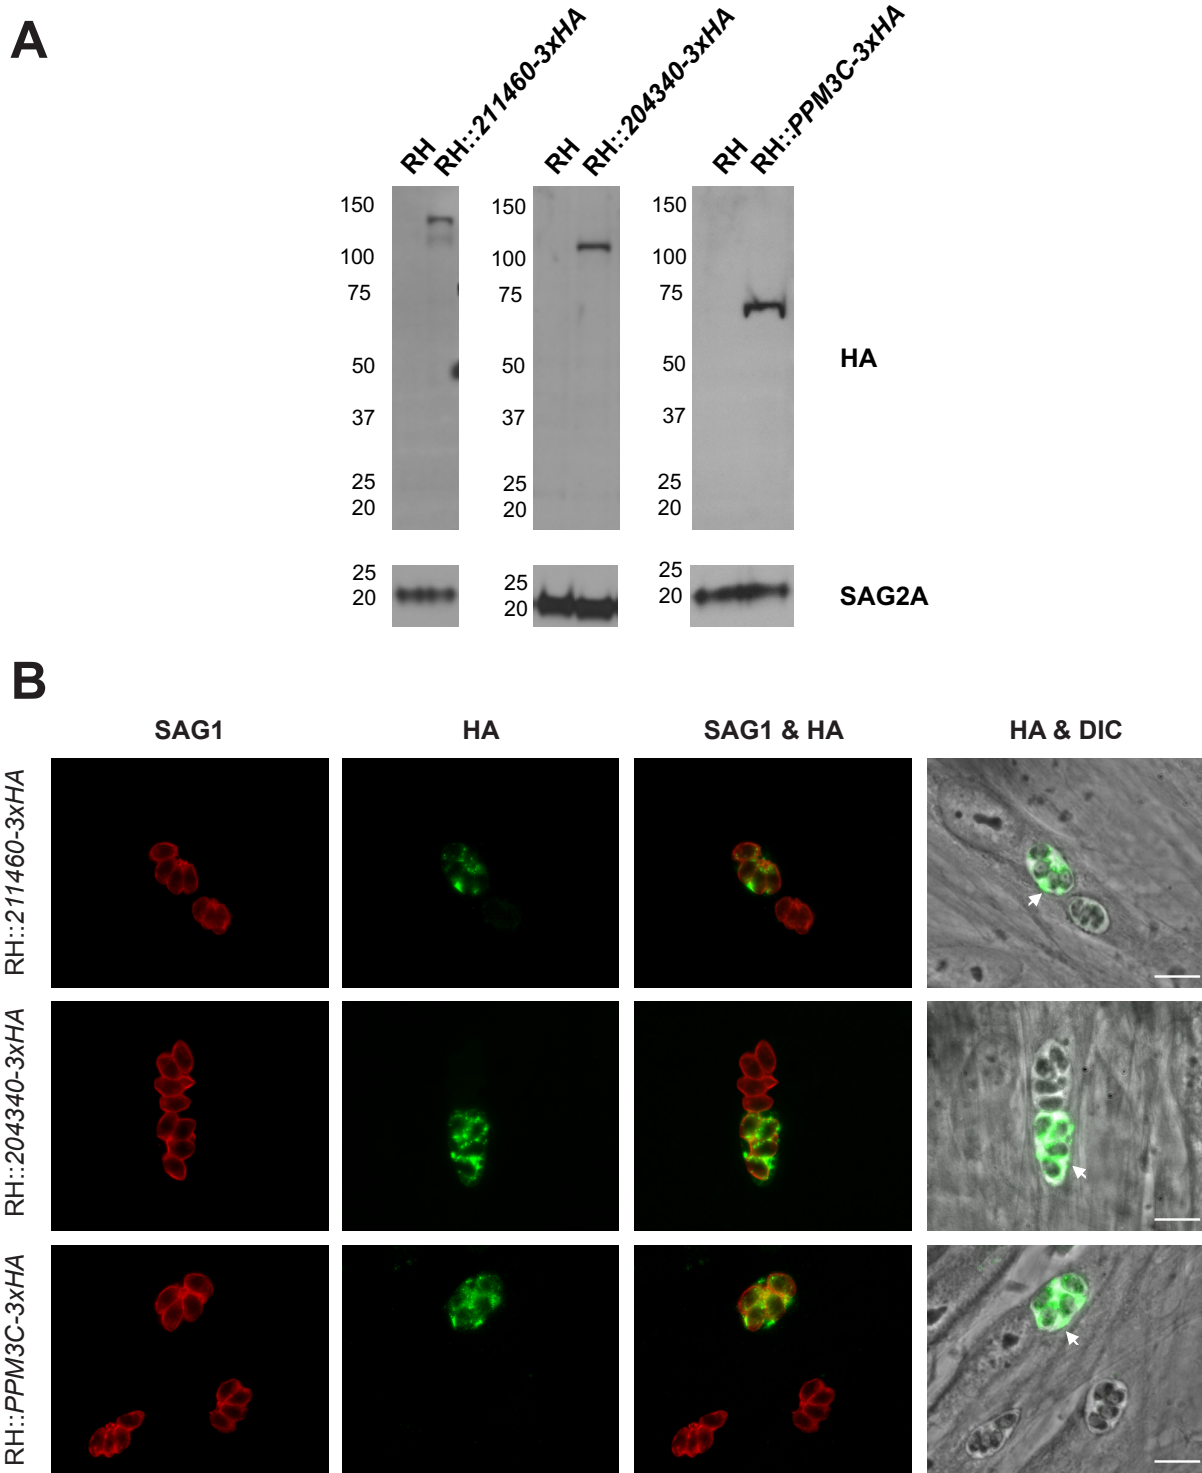

881 A. Western blot of endogenously tagged parasite proteins. HFFs were infected with  
882 RH $\Delta$ *hpt* $\Delta$ *ku80* tachyzoites (RH) or with populations of RH that had been transfected  
883 with HA-tagging plasmids targeted to the indicated locus (RH::211460-3xHA,  
884 RH::204340-3xHA, and RH::PPM3C-3xHA). Lysates from infected HFFs were  
885 prepared and the HA-tagged proteins were detected by western blotting and probing  
886 with rat anti-HA antibodies. Rabbit anti-SAG2A staining was used as a loading  
887 control for total parasite protein. Approximate migration of a ladder of size standards  
888 (sizes in kDa) is indicated.

889 B. Representative immunofluorescence microscopy images of endogenously tagged  
890 parasite proteins. The populations of endogenously tagged parasites analyzed in  
891 Fig. 2A were allowed to infect HFFs for 16 hours before the infected monolayers  
892 were fixed with methanol. The corresponding tagged proteins in parasites that had  
893 successfully incorporated the HA-tag were detected with rat anti-HA antibodies,  
894 while all tachyzoites were detected with mouse anti-SAG1 antibodies and the entire  
895 monolayer was visualized with differential interference microscopy (DIC). The arrows  
896 indicate localization of the endogenously tagged proteins outside of the parasites  
897 and within the PV. Scale bar is 10 $\mu$ m.

898

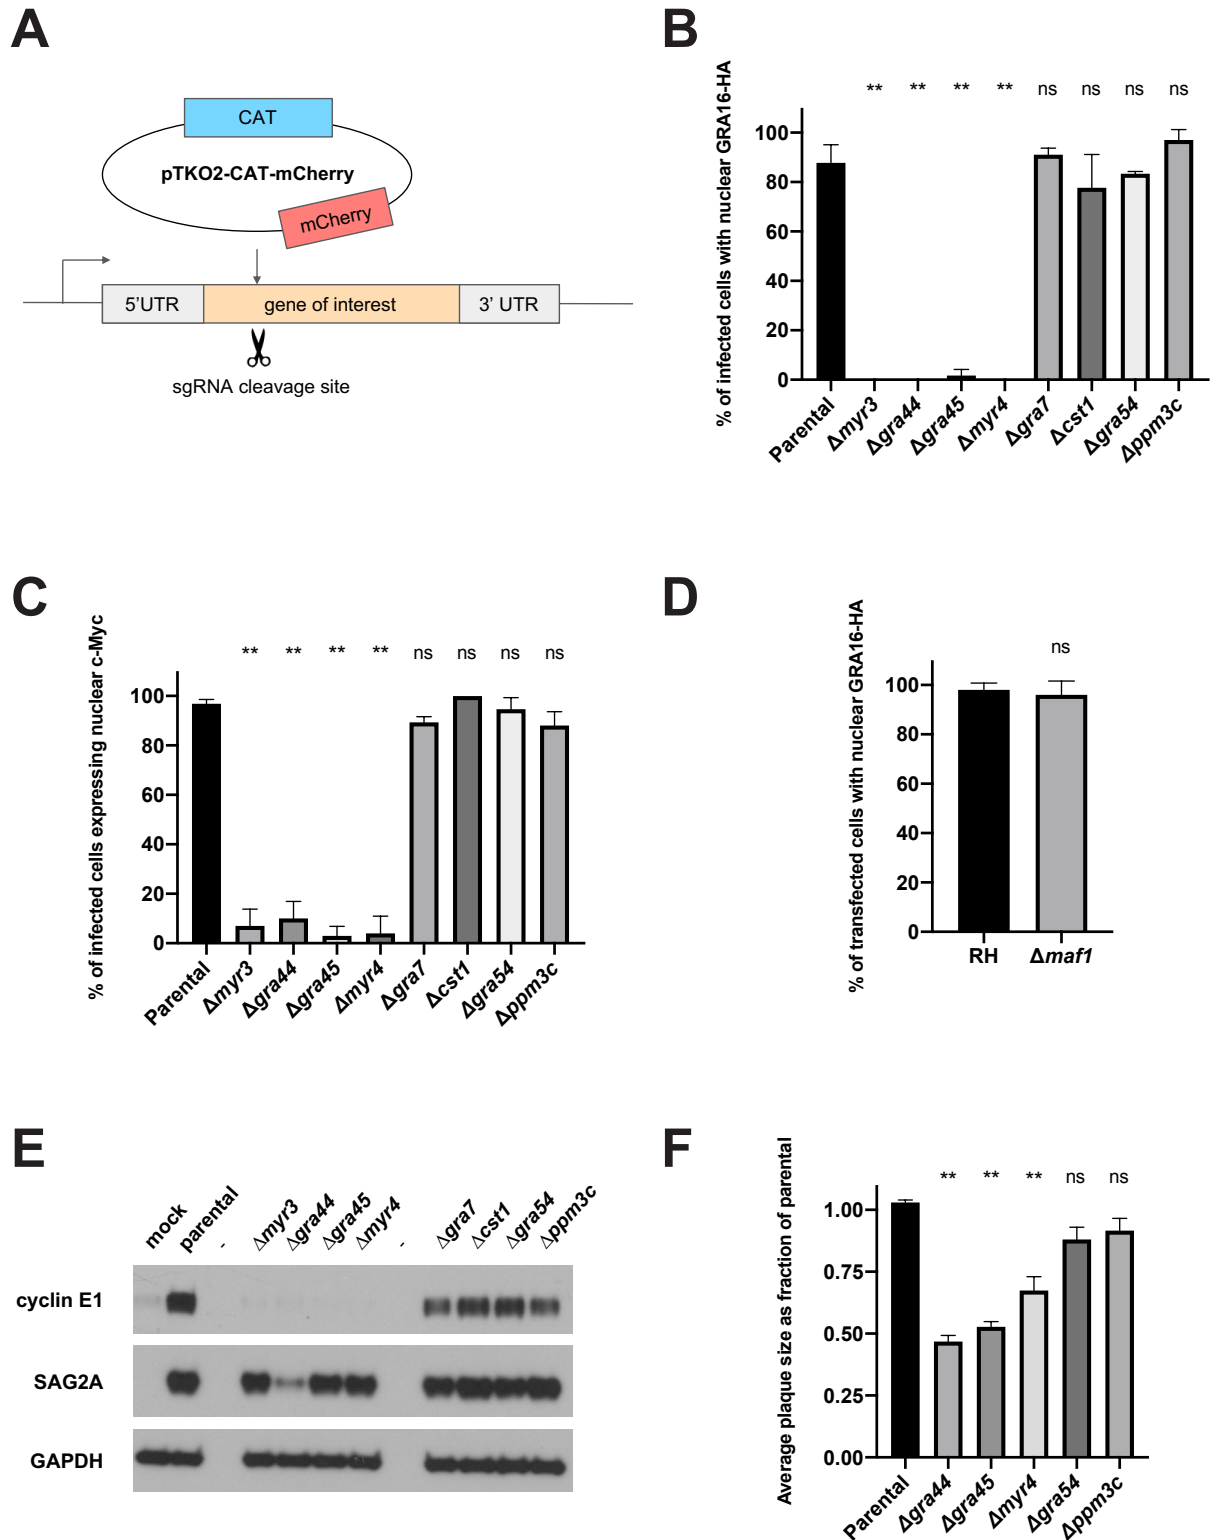

899

900 **Figure 3. GRA44, GRA45, and MYR4 are required for *Toxoplasma* effector**

901 **translocation and fully efficient growth *in vitro*.**

- 902 A. Schematic of CRISPR-mediated gene disruption of candidate genes followed by  
903 insertion of the pTKO2 plasmid carrying *mCherry* and a *chloramphenicol acetyl*  
904 *transferase* (*CAT*) gene for selection in chloramphenicol.
- 905 B. Quantification of the percentage of infected cells showing GRA16-HA in the host  
906 nucleus via IFA. Tachyzoites were allowed to infect HFFs for 16 hours before the  
907 infected monolayers were fixed with methanol and stained with rat anti-HA  
908 antibodies. The averages are based on examination of at least 25 infected host cells  
909 per experiment from 2-5 biological replicates, and error bars indicate the standard  
910 deviation (SD). Statistics were performed using one-way ANOVA and Dunnett's  
911 multiple comparisons test. \*\* indicates  $p < 0.0001$  and ns indicates nonsignificance  
912 ( $p > 0.05$ ) for the indicated strain relative to the parental control.
- 913 C. Quantification of the percentage of infected cells showing upregulation of human c-  
914 Myc protein in the host nucleus via IFA. Tachyzoites were allowed to infect HFFs in  
915 serum-free media for 20 hours before the infected monolayers were fixed with  
916 methanol and stained with rabbit anti-c-Myc antibodies. Scoring and statistics are as  
917 for Fig. 3B.
- 918 D. Quantification of the percentage of transfected, infected cells showing GRA16-HA in  
919 the host nucleus via IFA. Wild-type  $RH\Delta hpt$  and  $RH\Delta maf1$  tachyzoites were  
920 transiently transfected with a plasmid expressing GRA16-HA, and transfected  
921 parasites were allowed to infect HFFs for 16 hours before the infected monolayers  
922 were fixed with methanol and stained with rat anti-HA antibodies. The averages are  
923 based on the examination of 25 vacuoles from 2 biological replicates, and error bars  
924 indicate the SD. Statistics are as for Fig. 3B.

925 E. Western blot of human cyclin E1 protein in infected cells. HFFs were infected with  
926 the indicated tachyzoites, or mock-treated with uninfected HFF lysate, for 18 hours  
927 before lysates were generated for immunoblotting. Lysates were analyzed by  
928 western blotting using mouse anti-cyclin E1 antibodies. Rabbit anti-SAG2A and  
929 mouse anti-GAPDH were used to assess the levels of parasite and host protein in  
930 the lysate respectively. “-“ indicates empty lanes.

931 F. Quantification of plaque size. HFFs were infected with tachyzoites of the indicated  
932 strain for 7 days, fixed with methanol, and then stained with crystal violet. Plaque  
933 size was measured using ImageJ. Plaque areas were normalized to the median of  
934 the parental strain for each biological replicate. The averages are based on the  
935 results of at least 3 independent biological replicates, each with 2-3 technical  
936 replicates, and error bars represent the standard error of the mean. Statistics are as  
937 for Fig. 3B.

938



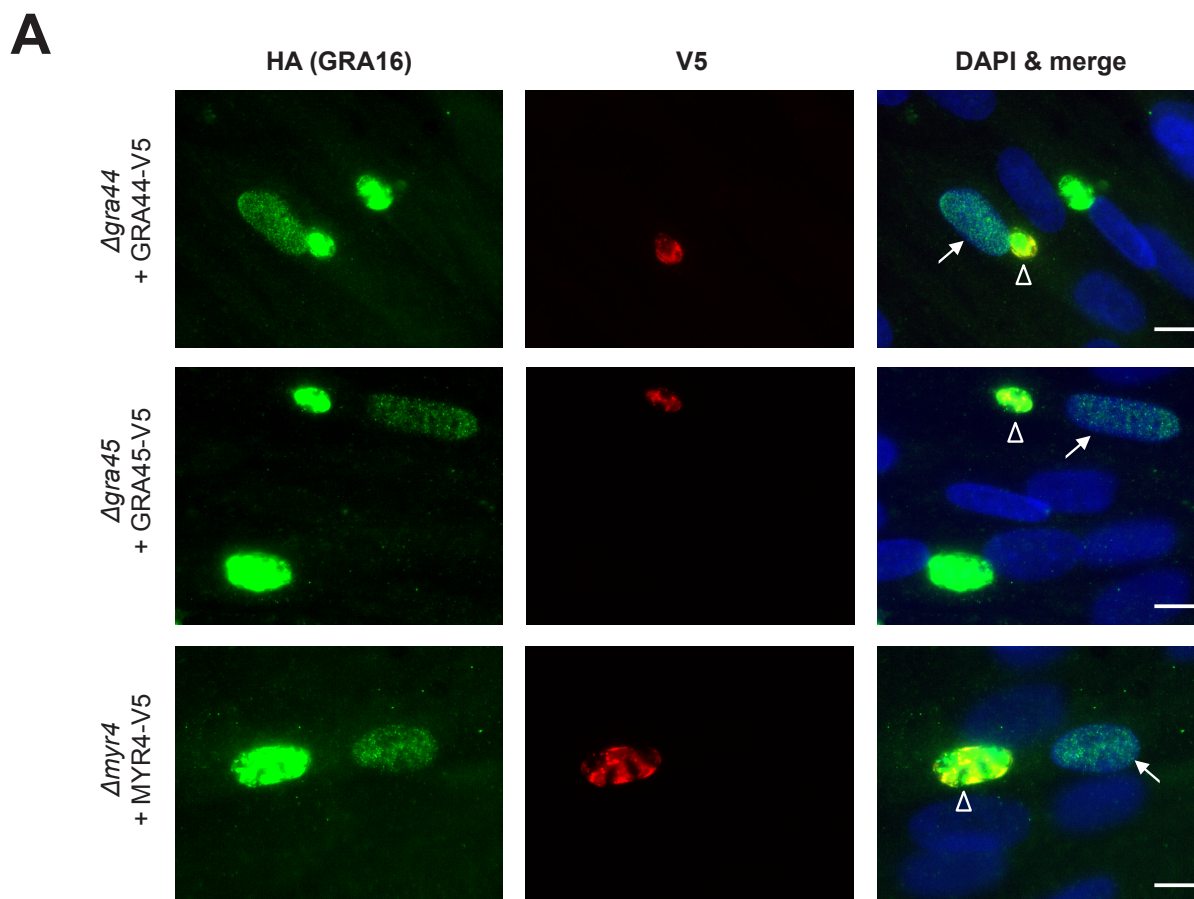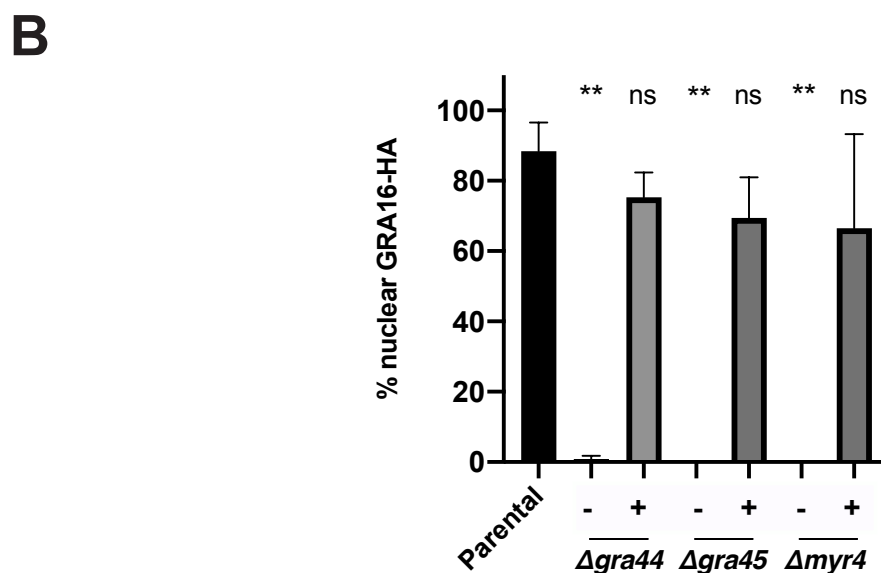

939

940 **Figure 4. Ectopic protein expression rescues the effector translocation defect in**

941  **$\Delta gra44$ ,  $\Delta gra45$ , and  $\Delta myr4$  parasites.**

- 942 A. Representative immunofluorescence microscopy images of transiently expressed  
943 GRA44, GRA45, and MYR4 proteins. The indicated strains were transiently  
944 transfected with plasmids expressing the corresponding, C-terminally V5-tagged  
945 protein under its native promoter and the tachyzoites were allowed to infect HFFs for  
946 18-22 hours before the infected monolayers were fixed with methanol. Localization  
947 of the V5-tagged proteins and rescue of the GRA16-HA host nuclear translocation  
948 were assessed by IFA using mouse anti-V5 and rat anti-HA antibodies, respectively.  
949 White arrows indicate a GRA16-HA positive host nucleus in a cell infected with  
950 tachyzoites expressing the indicated V5 tagged protein (white open  
951 arrowheads). Scale bar is 10 $\mu$ m.
- 952 B. Quantification of the data represented in Fig. 4A showing the percentage of infected  
953 cells showing GRA16-HA in the host nucleus via IFA. The indicated strains were  
954 transiently transfected with either empty plasmid (-) or plasmids expressing the  
955 corresponding C-terminally V5-tagged protein (+) under its native promoter. Scoring  
956 and statistics are as for Fig. 3B, except for “+” conditions where only cells infected  
957 with V5-positive vacuoles were quantified.

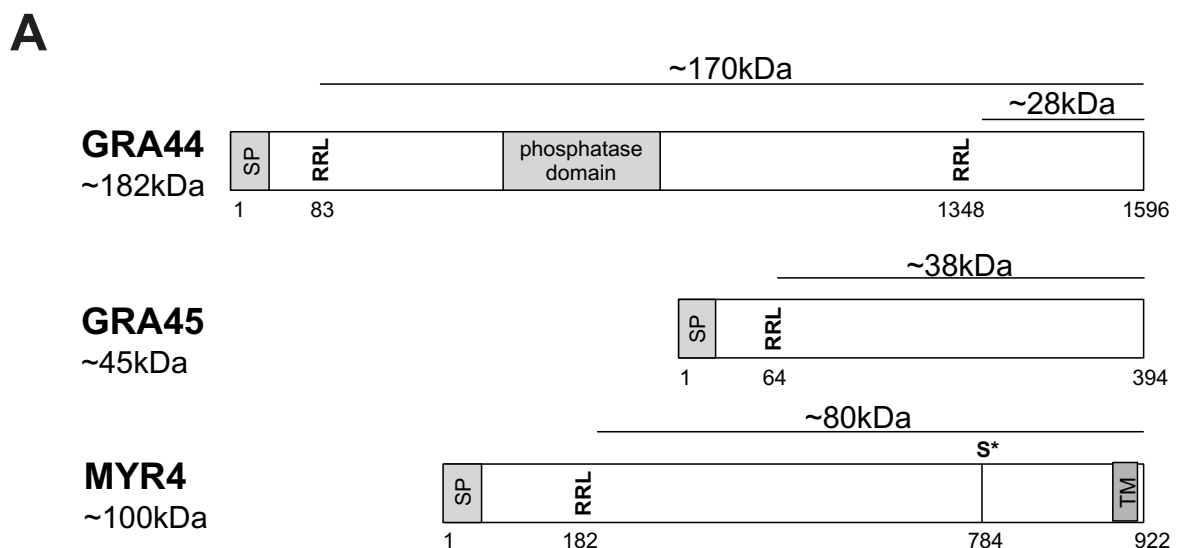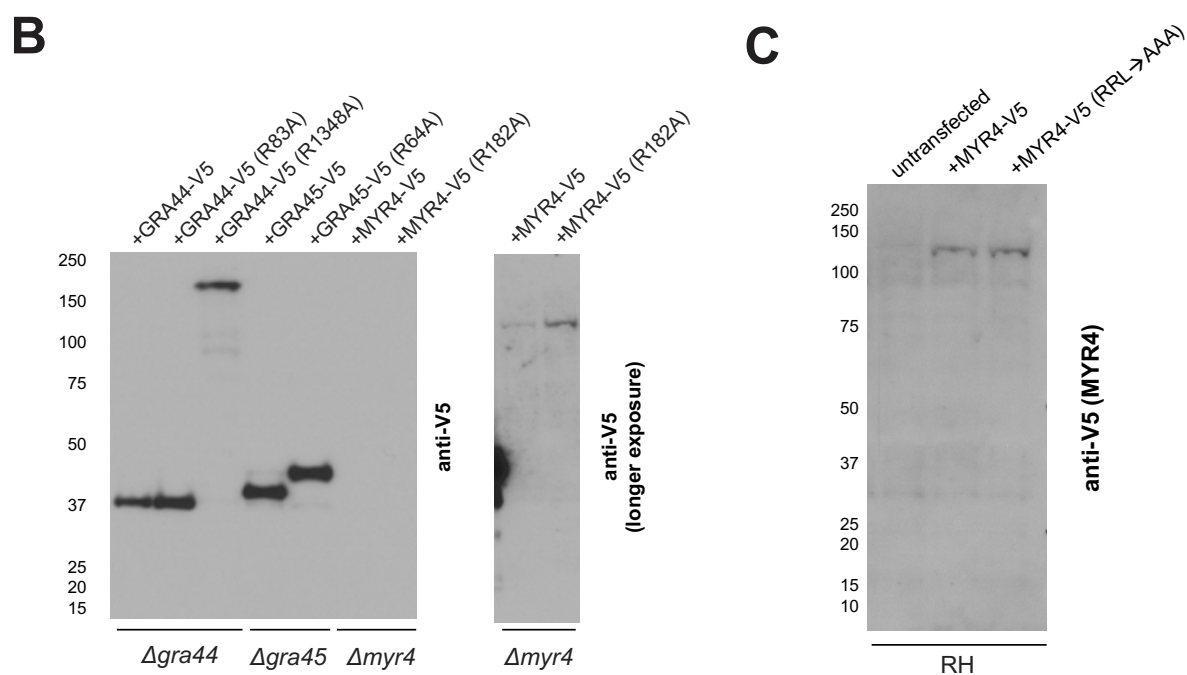

958

959 **Figure 5. GRA44 and GRA45, but not MYR4, show evidence for processing at**  
 960 **RRL sites.**

961 A. Schematic of GRA44, GRA45, and MYR4 protein sequence showing the location of  
 962 predicted signal peptides (SP), RRL tripeptide sequences, previously identified  
 963 phosphorylated serine residues (S\*) and conserved domains, numbered in amino

964 acid residues relative to the predicted N-terminus of the primary translation product.  
965 Approximate molecular weights (kDa) of the indicated portions are indicated. The  
966 amino acid sequence of MYR4 was determined using the 4th in-frame methionine  
967 relative to the protein predicted in ToxoDB (v45). Transmembrane domain prediction  
968 based on Phobius (Lukas Kall et al., *Nucleic Acids Res* 35:W429-32, 2007,  
969 <https://doi.org/10.1093/nar/gkm256>).

970 B. Western blot of protein processing. The indicated parasite lines were transiently  
971 transfected with plasmids expressing C-terminally V5-tagged versions of either the  
972 indicated wildtype protein or a mutant version with the indicated RRL mutated to  
973 ARL (numbers indicate the amino acid position of the mutated arginine). These were  
974 then used to infect HFFs for 18 hours. Lysates were analyzed by western blotting  
975 using mouse anti-V5 antibodies to detect the C-terminally V5-tagged portions of  
976 each protein. Approximate migration of a ladder of size standards (sizes in kDa) is  
977 indicated. The right panel is a longer exposure of the right-most two lanes of the left  
978 panel.

979 C. Western blot of MYR4 processing. RH $\Delta$ *hpt* (RH) parasites were transiently  
980 transfected with either WT or an RRL $\rightarrow$ AAA mutated version of C-terminally V5-  
981 tagged MYR4 and allowed to infect HFFs for 24 hours before lysates were  
982 generated for immunoblotting. Lysates were analyzed by western blotting using  
983 mouse anti-V5 antibodies to detect MYR4. Approximate migration of a ladder of size  
984 standards (sizes in kDa) is indicated.

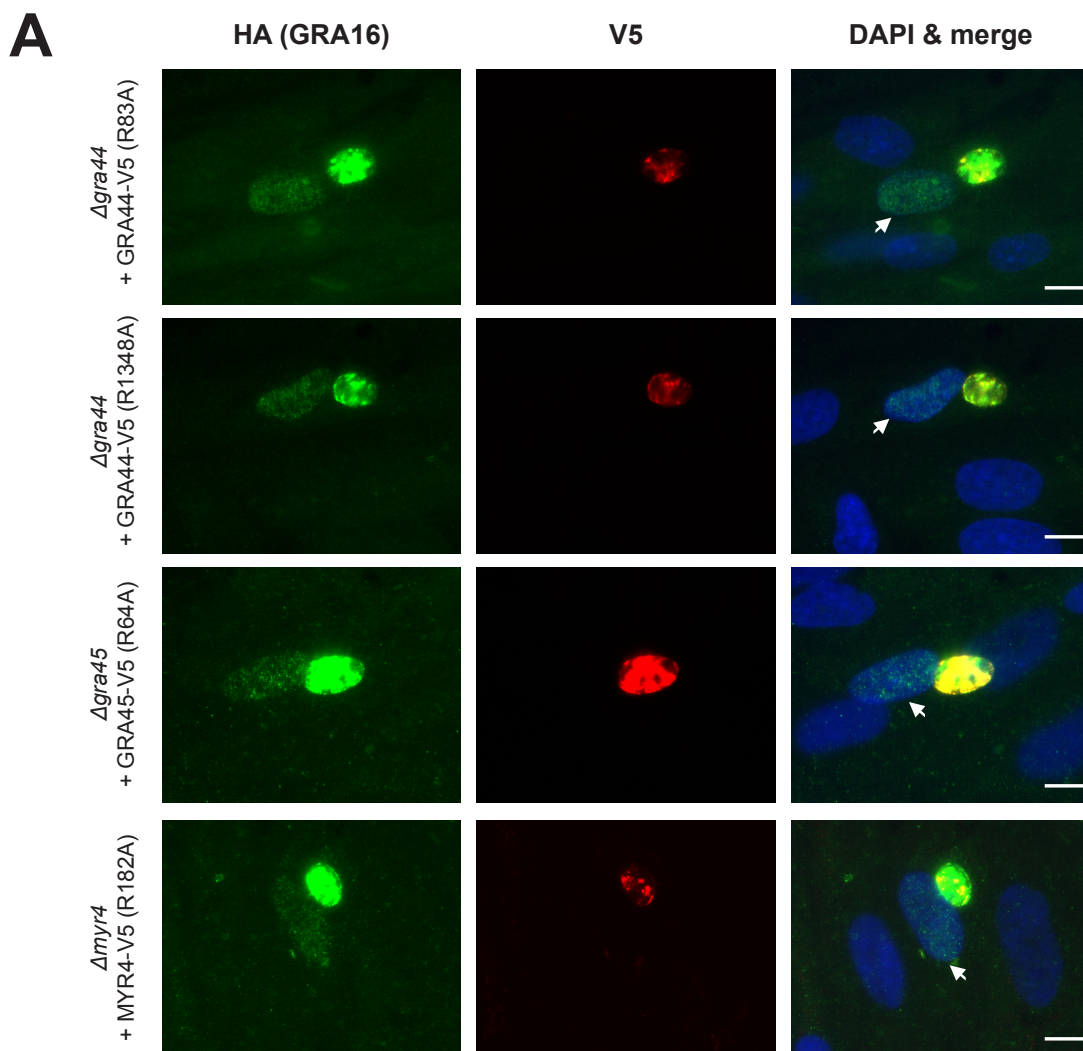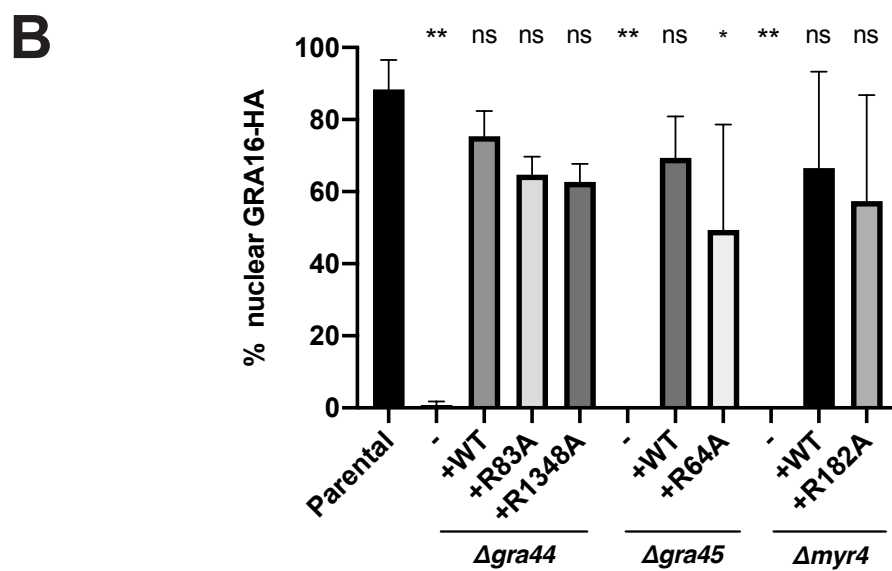

986 **Figure 6. Ectopic expression of RRL mutants of GRA44, GRA45, and MYR4**  
987 **rescues the translocation defect in  $\Delta gra44$ ,  $\Delta gra45$ , and  $\Delta myr4$  parasites.**

988 A. Representative immunofluorescence microscopy images of transiently expressed  
989 GRA44, GRA45, and MYR4 RRL→ARL mutated proteins. The indicated strains  
990 were transiently transfected with plasmids expressing the corresponding C-  
991 terminally V5-tagged protein under its native promoter and the tachyzoites were  
992 allowed to infect HFFs for 18-22 hours before the infected monolayers were fixed  
993 with methanol. Localization of the V5-tagged proteins and rescue of the GRA16-HA  
994 host nuclear translocation were assessed by IFA using mouse anti-V5 and rat anti-  
995 HA antibodies, respectively. White arrows indicate a GRA16-HA positive host  
996 nucleus in a cell infected with tachyzoites expressing the indicated V5 tagged  
997 protein. Scale bar is 10 $\mu$ m.

998 B. Quantification of the data represented in Fig. 6A showing the percentage of infected  
999 cells showing GRA16-HA in the host nucleus via IFA. The indicated strains were  
1000 transiently transfected with either empty plasmid (-) or plasmids expressing the  
1001 corresponding C-terminally V5-tagged protein (+) under its native promoter. The  
1002 data for the untransfected parental strain, the empty plasmid transfected strains, and  
1003 the wildtype protein transfected strains are the same as in Fig. 4B and are included  
1004 here for ease of comparison. Scoring and statistics are as for Fig. 4B except \*  
1005 indicates  $p=0.017$ .
