# Supplementary material for: Co-immunoprecipitation with MYR1 identifies three additional proteins within the Toxoplasma parasitophorous vacuole required for translocation of dense granule effectors into host cells
Source: bioRxiv or medRxiv preprint supplement (doi:10.1101/867788), 2019-12-06
Supplement: Supplementary file [file media-1.pdf]

| <i>Toxoplasma gondii</i> |       |              |               |                 |      | <i>Hammondia hammondi</i> |                  | <i>Neospora caninum</i> |                  |                                                                                  |
|--------------------------|-------|--------------|---------------|-----------------|------|---------------------------|------------------|-------------------------|------------------|----------------------------------------------------------------------------------|
| Gene ID                  | Alias | Localization | Predicted TMs | Phenotype score | RRLs | Amino acid identity       | RRL(s) conserved | Amino acid identity     | RRL(s) conserved | Comments                                                                         |
| 254470                   | MYR1  | PV           | 1             | 0.88            | 1    | 84%                       | 1 of 1           | 44%                     | 1 of 1           | A second RRL exists in middle of NcMYR1<br>An RRL exists in the C-term of NcMYR2 |
| 270700                   | MYR2  | PV           | 2             | 2.39            | 0    | 84%                       | n/a              | 36%                     | n/a              |                                                                                  |
| 237230                   | MYR3  | PV           | 1             | 2.83            | 0    | 72%                       | n/a              | 31%                     | n/a              | An additional RRL exists in the C-term of NcGRA45                                |
| 211460                   | MYR4  | PV           | 1             | 0.25            | 1    | 84%                       | 1 of 1           | 48%                     | 0 of 1           |                                                                                  |
| 228170                   | GRA44 | PV           | 0             | -3.28           | 2    | 94%                       | 2 of 2           | 68%                     | 2 of 2           |                                                                                  |
| 316250                   | GRA45 | PV           | 0             | 1.15            | 1    | 92%                       | 0 of 1           | 70%                     | 1 of 1           |                                                                                  |
| 258580                   | ROP17 | PV           | 0             | 1.29            | 2    | 83%                       | 2 of 2           | 52%                     | 0 of 2           |                                                                                  |
| 242720                   | ASP5  | Golgi        | 3             | -1.45           | 1    | 90%                       | 0 of 1           | 66%                     | 0 of 1           |                                                                                  |

**Supplemental Table 1.**

**A**

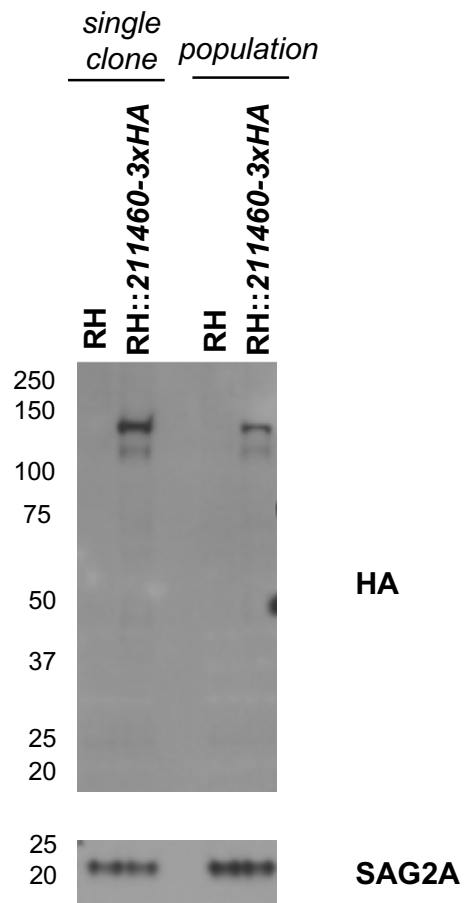

**B**

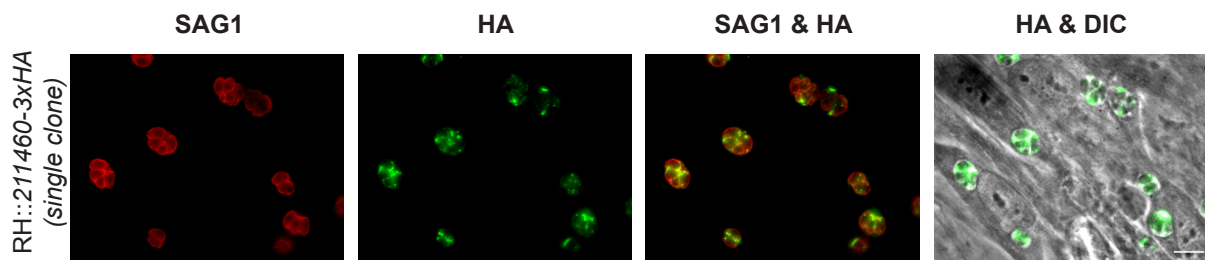

Supplemental Figure 1.

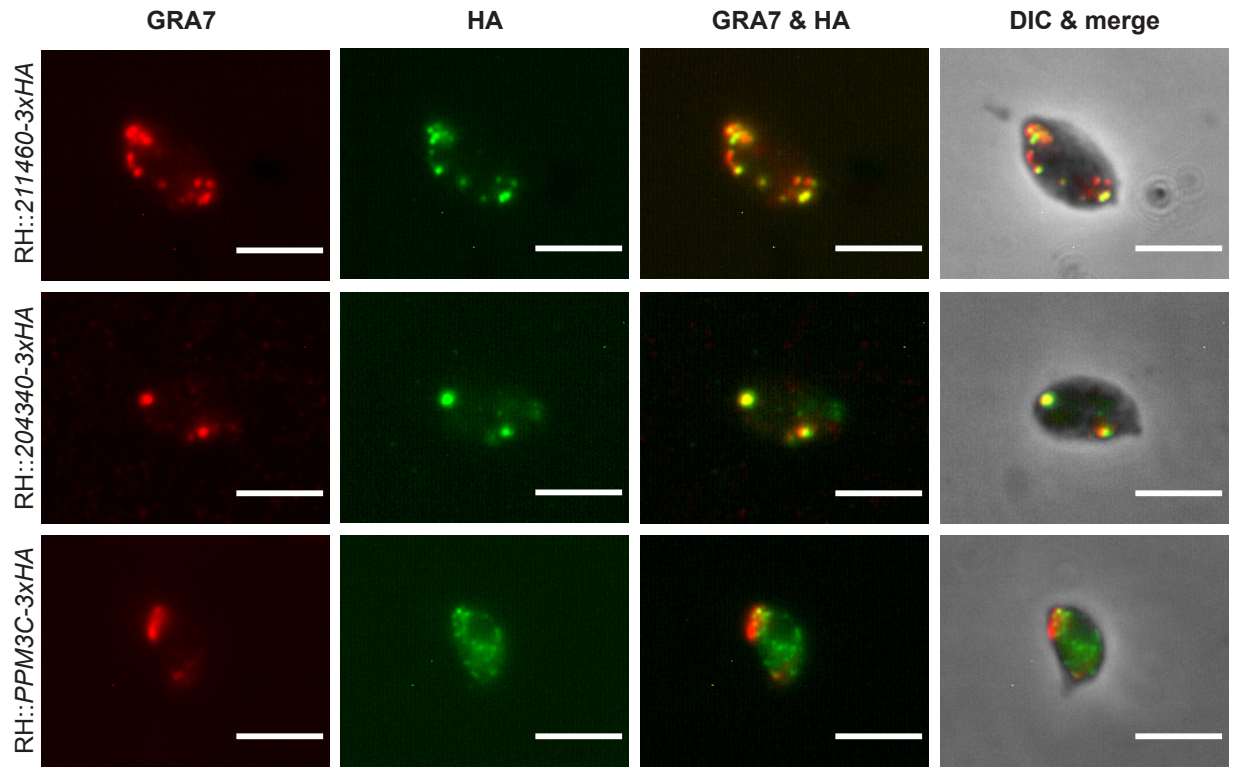

**Supplemental Figure 2.**

**A**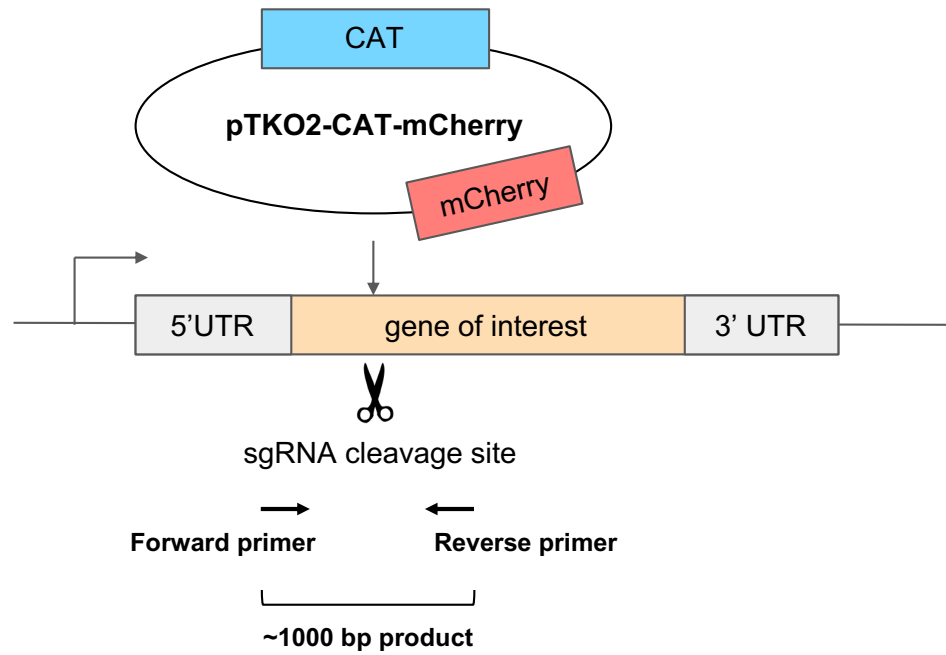**B**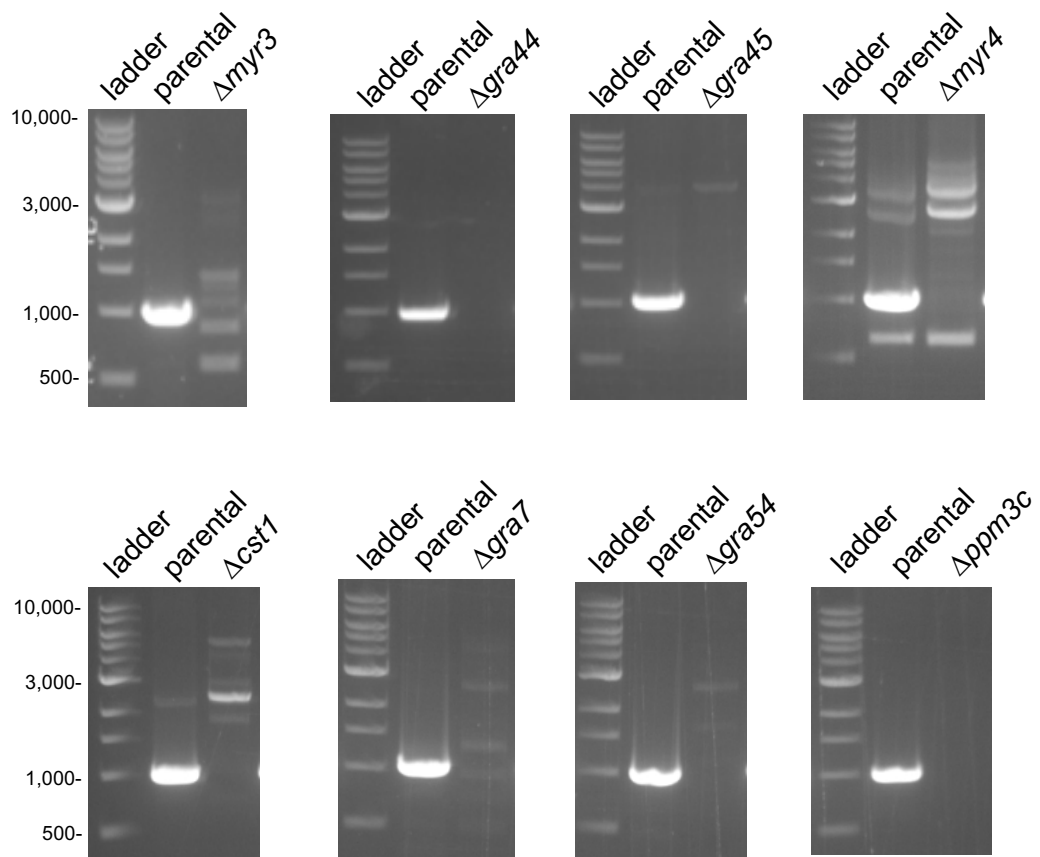**Supplemental Figure 3.**

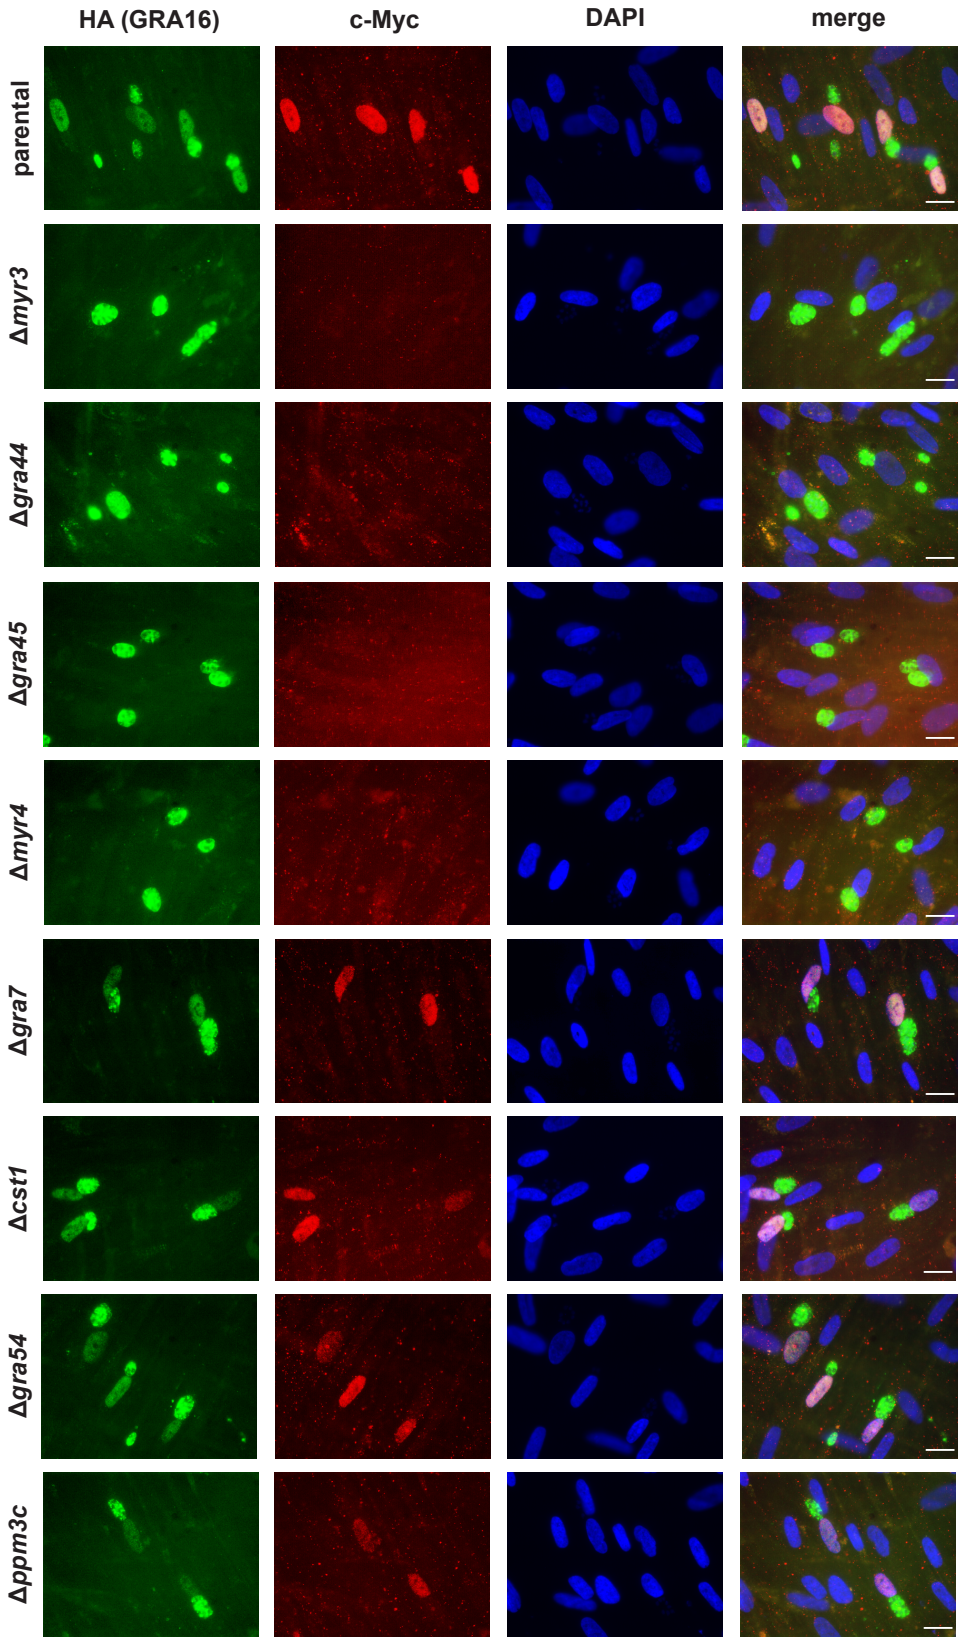

Supplemental Figure 4.

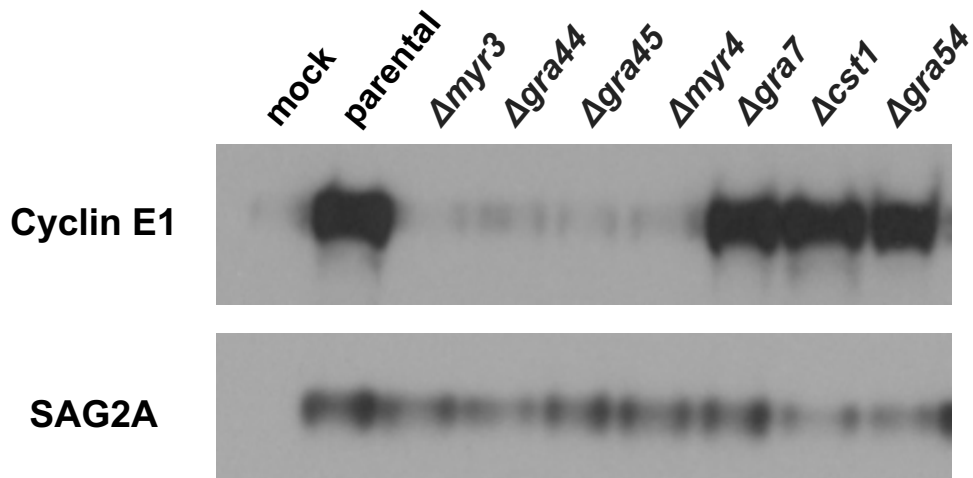

Supplemental Figure 5.
